# Supplementary material for: Accuracy of Fitbit Devices: Systematic Review and Narrative Syntheses of Quantitative Data
Source: PubMed Central journal article supplement (PMC6107736; doi:10.2196/10527), 2018-08-09
Supplement: mhealth_v6i8e10527_app3.pdf [file mhealth_v6i8e10527_app3.pdf]

| Author (Year)     | Model             | Location | Activity Setting | Outcome Measure    | Criterion tool (Model)               | Unit of measurement       | Activity Type                 | Activity Details                                            | % Group Difference |
|-------------------|-------------------|----------|------------------|--------------------|--------------------------------------|---------------------------|-------------------------------|-------------------------------------------------------------|--------------------|
| Adam Noah (2013)  | Classic (x2)      | Hip      | Controlled       | Energy Expenditure | Indirect calorimetry (K4b2 Cosmed)   | kcal/min                  | Walk:Treadmill                | Walk (5.63 kph / 3.5 mph ) [1.56 m/s]                       | -10.02%            |
| Adam Noah (2013)  | Ultra (x2)        | Hip      | Controlled       | Energy Expenditure | Indirect calorimetry (K4b2 Cosmed)   | kcal/min                  | Walk:Treadmill                | Walk-(5.63 kph ) [1.56 m/s]                                 | -11.04%            |
| Adam Noah (2013)  | Classic (x2)      | Hip      | Controlled       | Energy Expenditure | Indirect calorimetry (K4b2 Cosmed)   | kcal/min                  | Walk Incline:Treadmill        | Walk-5% Incline (5.63 kph / 3.5 mph) [1.56 m/s]             | -41.42%            |
| Adam Noah (2013)  | Ultra (x2)        | Hip      | Controlled       | Energy Expenditure | Indirect calorimetry (K4b2 Cosmed)   | kcal/min                  | Walk Incline:Treadmill        | Walk-5% Incline (5.63 kph 3.5 mph ) [1.56 m/s]              | -41.08%            |
| Adam Noah (2013)  | Classic (x2)      | Hip      | Controlled       | Energy Expenditure | Indirect calorimetry (K4b2 Cosmed)   | kcal/min                  | Jog: Treadmill                | Jog (8.85 kph / 5.5mph) [2.46 m/s]                          | -11.46%            |
| Adam Noah (2013)  | Ultra (x2)        | Hip      | Controlled       | Energy Expenditure | Indirect calorimetry (K4b2 Cosmed)   | kcal/min                  | Jog: Treadmill                | Jog (8.85 kph / 5.5 mph) [2.46 m/s]                         | 9.80%              |
| Adam Noah (2013)  | Classic (x2)      | Hip      | Controlled       | Energy Expenditure | Indirect calorimetry (K4b2 Cosmed)   | kcal/min                  | Stairs                        | Stair Stepping (30.5 cm height at 96 steps / min),0.48 m/s  | -40.51%            |
| Adam Noah (2013)  | Ultra (x2)        | Hip      | Controlled       | Energy Expenditure | Indirect calorimetry (K4b2 Cosmed)   | kcal/min                  | Stairs                        | Stair Stepping (30.5 cm height at 96 steps / min), 0.48 m/s | -44.28%            |
| Alharbi (2016)    | Flex              | Wrist    | Freeliving       | Steps              | Accelerometry (Actigraph GT3X)       | Steps / day               | Normal Daility Activities     | 4 days (2 weekday, 2 weekend), waking hours                 | 13.0%              |
| Alharbi 2016      | Flex              | Wrist    | Freeliving       | Time in Activity   | Accelerometry (Actigraph GT3X)       | MVPA (Mins / Day)         | 4 days (2 weekday, 2 weekend) | MVPA: > = 2020 counts / minute. FB: > 3 METS                | 10%                |
| Bai (2016)        | Flex              | Wrist    | Controlled       | Energy Expenditure | Indirect calorimetry (Oxycon Mobile) | Total EE (kcal / 20-min)  | Resting                       | Sedentary Behaviors                                         | -15.07%            |
| Bai (2016)        | Flex              | Wrist    | Controlled       | Energy Expenditure | Indirect calorimetry (Oxycon Mobile) | Total EE (kcal / 25-min)  | Ambulation: Treadmill         | Aerobic Activities:                                         | 26.80%             |
| Bai (2016)        | Flex              | Wrist    | Controlled       | Energy Expenditure | Indirect calorimetry (Oxycon Mobile) | Total EE (kcal / 25-min)  | Physical Activity: Resistance | Resistance Activities                                       | -29.83%            |
| Balto (2016)      | One               | Hip      | Controlled       | Steps              | Visual Observation / Count           | Number: Steps / 500 steps | Walk: Treadmill               | 500 steps, comfortable walking speed                        | -13.07%            |
| Balto (2016)      | Flex              | Wrist    | Controlled       | Steps              | Visual Observation / Count           | Number: Steps / 500 steps | Walk: Treadmill               | 500 steps comfortable walking speed                         | -1.72%             |
| Battenberg (2017) | One               | Waist    | Controlled       | Steps              | Visual Observation / Count           | Distance: steps/1200 m    | Walking: Hallway              | steps/ 3 x 400 m (brisk walking, self-paced)                | 0.29%              |
| Battenberg (2017) | One               | Waist    | Controlled       | Steps              | Visual Observation / Count           | Distance: steps/1200 m    | Walking: Hallway              | steps/3 x 400 m (run, self-paced)                           | -0.07%             |
| Battenberg (2017) | One               | Waist    | Controlled       | Steps              | Visual Observation / Count           | Distance: steps/ 30m      | Walking: Hallway              | walk 3 x 10 m (self-paced, household, slow)                 | -0.36%             |
| Battenberg (2017) | One               | Waist    | Controlled       | Steps              | Visual Observation / Count           | Number: # steps/10        | Stairs: Ascend                | steps/10 steps (stairs, ascend)                             | 3.67%              |
| Battenberg (2017) | One               | Waist    | Controlled       | Steps              | Visual Observation / Count           | Number: # steps/10        | Stairs: Descend               | steps/10 steps (stairs, descend)                            | -0.78%             |
| Battenberg (2017) | Force             | Wrist    | Controlled       | Steps              | Visual Observation / Count           | Distance: steps/1200 m    | Walking: Hallway              | steps/ 3 x 400 m (brisk walking, self-paced)                | -7.90%             |
| Battenberg (2017) | Force             | Wrist    | Controlled       | Steps              | Visual Observation / Count           | Distance: steps/1200 m    | Walking: Hallway              | steps/3 x 400 m (run, self-paced)                           | -2.92%             |
| Battenberg (2017) | Force             | Wrist    | Controlled       | Steps              | Visual Observation / Count           | Distance: steps/30m       | Walking: Hallway              | walk 3 x 10 m (self-paced, household, slow)                 | -11.50%            |
| Battenberg (2017) | Force             | Wrist    | Controlled       | Steps              | Visual Observation / Count           | Number: # steps/10        | Stairs: Ascend                | steps/10 steps (stairs, ascend)                             | 0.78%              |
| Battenberg (2017) | Force             | Wrist    | Controlled       | Steps              | Visual Observation / Count           | Number: # steps/10        | Stairs: Descend               | steps/10 steps (stairs, descend)                            | -6.33%             |
| Battenberg (2017) | One               | Waist    | Controlled       | Steps              | Visual Observation / Count           | Time: Steps/2 min         | Walking: Treadmill            | steps/2 min, 1.0 mph, 0.45 m/s                              | -19.80%            |
| Battenberg (2017) | One               | Waist    | Controlled       | Steps              | Visual Observation / Count           | Time: Steps/2 min         | Walking: Treadmill            | steps/2 min, 1.5 mph, 0.67 m/s                              | -1.72%             |
| Battenberg (2017) | One               | Waist    | Controlled       | Steps              | Visual Observation / Count           | Time: Steps/2 min         | Walking: Treadmill            | steps/2 min, 1.8 mph, 0.80 m/s                              | 0.27%              |
| Battenberg (2017) | One               | Waist    | Controlled       | Steps              | Visual Observation / Count           | Time: Steps/2 min         | Walking: Treadmill            | steps/2 min, 2.0 mph, 0.89 m/s                              | -0.04%             |
| Beevi (2015)      | Zip               | Hip      | Controlled       | Steps              | Visual Observation / Count           | Number: Steps / 100 steps | Walk: Treadmil                | One hundred steps @ 3 km / hour) x4 [0.83 m/s]              | 0.70%              |
| Beevi (2015)      | Zip               | Hip      | Controlled       | Steps              | Visual Observation / Count           | Number: Steps / 100 steps | Walk: Treadmil                | One hundred steps @ 1 km / hour x4 [0.28 m/s]               | -95.98%            |
| Beevi (2015)      | Zip               | Hip      | Controlled       | Steps              | Visual Observation / Count           | Number: Steps / 100 steps | Walk: Treadmil                | One hundred steps @ 2 km / hour) x4 [0.56 m/s]              | -17.27%            |
| Brewer (2017)     | Charge HR,        | Wrist    | Freeliving       | Steps              | Accelerometry (Actigraph GT3X))      | Steps / day               | Normal Daility Activities     | 7 days, waking hours                                        | 30%                |
| Brewer (2017)     | Charge HR, Charge | Wrist    | Freeliving       | Time in Activity   | Accelerometry (Actigraph GT3X))      | MVPA (Mins / Day)         | 7 days, waking hours          | AG not defined, FB: active minutes                          | 3%                 |
| Brooke (2016)     | Flex              | Wrist    | Free Living      | Sleep              | Accelerometry (SW Mini)              | Total Bed Time (min)      | Home sleep                    | 1 night                                                     | 9%                 |
| Brooke (2016)     | Charge HR         | Wrist    | Free Living      | Sleep              | Accelerometry (SW Mini)              | Total Bed Time (min)      | Home sleep                    | 1 night                                                     | 4%                 |
| Brooke (2016)     | Flex              | Wrist    | Free Living      | Energy Expenditure | Accelerometry (SenseWear model MF)   | Total EE (kcal / day)     | Normal Daily Activities       | 24 h                                                        | -14.9%             |
| Brooke (2016)     | Charge HR         | Wrist    | Free Living      | Energy Expenditure | Accelerometry (SenseWear model MF)   | Total EE (kcal / day)     | Normal Daily Activities       | 24 h                                                        | -13.7%             |
| Chen 2016         | Flex              | Wrist    | Controlled       | Steps              | Visual Observation / Count           | Time: Steps / 5 min       | Walk: Push Stroller           | pushing a stroller 5 min (dominant)                         | -52.50%            |
| Chen 2016         | Flex              | Wrist    | Controlled       | Steps              | Visual Observation / Count           | Time: Steps / 5 min       | Walk: Push Stroller           | pushing a stroller,5 min (non-dominant)                     | -35.60%            |
| Chen 2016         | Flex              | Wrist    | Controlled       | Steps              | Visual Observation / Count           | Time: Steps / 5 min       | Walk: Carry Bag               | carrying a bag, 5 min (non-dominant)                        | 7.50%              |
| Chen 2016         | Flex              | Wrist    | Controlled       | Steps              | Visual Observation / Count           | Time: Steps / 5 min       | Walk: Carry Bag               | carrying a bag, 5 min (dominant)                            | 11.10%             |
| Chen 2016         | Flex              | Wrist    | Controlled       | Steps              | Visual Observation / Count           | Time: Steps / 5 min       | Stair: Down                   | downstairs, 5 min (non-dominant)                            | -9.00%             |
| Chen 2016         | Flex              | Wrist    | Controlled       | Steps              | Visual Observation / Count           | Time: Steps / 5 min       | Stair: Up                     | upstairs, 5 min (non-dominant)                              | -7.80%             |
| Chen 2016         | Flex              | Wrist    | Controlled       | Steps              | Visual Observation / Count           | Time: Steps / 5 min       | Stair: Up                     | upstairs, 5 min (dominant)                                  | -6.50%             |
| Chen 2016         | Flex              | Wrist    | Controlled       | Steps              | Visual Observation / Count           | Time: Steps / 5 min       | Stair: Down                   | downstairs, 5 min (dominant)                                | -6.00%             |
| Chen 2016         | Flex              | Wrist    | Controlled       | Steps              | Visual Observation / Count           | Time: Steps / 5 min       | Jog: Treadmill                | 5 min, jogging = 134 m/min 2.2 m/s (dominant)               | -2.10%             |
| Chen 2016         | Flex              | Wrist    | Controlled       | Steps              | Visual Observation / Count           | Time: Steps / 5 min       | Jog: Treadmill                | 5 min, jogging = 134 m/min 2.2 m/s (non-dominant)           | 2.70%              |

|                  |                  |       |            |                    |                                        |                             |                                 |                                                              |         |
|------------------|------------------|-------|------------|--------------------|----------------------------------------|-----------------------------|---------------------------------|--------------------------------------------------------------|---------|
| Chen 2016        | Flex             | Wrist | Controlled | Steps              | Visual Observation / Count             | Time: Steps / 5 min         | Walk: treadmill                 | 5 min, moderate walk = 80 m/min, 1.3 m/s (non-dominant)      | -7.50%  |
| Chen 2016        | Flex             | Wrist | Controlled | Steps              | Visual Observation / Count             | Time: Steps / 5 min         | Walk: treadmill                 | 5 min fast walk = 107 m / min (1.78 m/s) (non-dominant)      | -6.20%  |
| Chen 2016        | Flex             | Wrist | Controlled | Steps              | Visual Observation / Count             | Time: Steps / 5 min         | Walk: treadmill                 | 5 min, moderate walk = 80 m/min, 1.3 m/s (dominant)          | -5.90%  |
| Chen 2016        | Flex             | Wrist | Controlled | Steps              | Visual Observation / Count             | Time: Steps / 5 min         | Walk: treadmill                 | 5 min fast walk = 107 m / min (1.78 m/s) (dominant)          | -4.90%  |
| Chen 2016        | Flex             | Wrist | Controlled | Steps              | Visual Observation / Count             | Time: Steps / 5 min         | Walk: treadmill                 | 5 min, slow walk= 54m/min (0.9 m/s) (dominant)               | -10.10% |
| Chen 2016        | Flex             | Wrist | Controlled | Steps              | Visual Observation / Count             | Time: Steps / 5 min         | Walk: treadmill                 | 5 min, slow walk= 54m/min 0.9 m/s (non -dominant)            | -6.60%  |
| Chow (2017)      | One              | Waist | Controlled | Steps              | Visual Observation / Count             | Time: steps/3 min           | Walking: Treadmill              | steps/3 min 5 km/h 1.39 m/s                                  | 0.30%   |
| Chow (2017)      | One              | Waist | Controlled | Steps              | Visual Observation / Count             | Time: steps/3 min           | Walking: Treadmill              | steps/3 min 6.5 km/h 1.8 m/s                                 | 1.20%   |
| Chow (2017)      | One              | Waist | Controlled | Steps              | Visual Observation / Count             | Time: steps/3 min           | Jog: Treadmill                  | steps/3 min 8 km/h 2.2 m/s                                   | -0.30%  |
| Chow (2017)      | One              | Waist | Controlled | Steps              | Visual Observation / Count             | Time: steps/3 min           | Jog: Treadmill                  | steps/3 min 10 km/h 2.8 m/s                                  | -0.40%  |
| Chow (2017)      | One              | Waist | Controlled | Steps              | Visual Observation / Count             | Time: steps/3 min           | Jog: Treadmill                  | steps/3 min 12 km/h 3.3 m/s                                  | -1.10%  |
| Chow (2017)      | Charge           | Wrist | Controlled | Steps              | Visual Observation / Count             | Time: steps/3 min           | Walking: Treadmill              | steps/3 min 5 km/h 1.39 m/s                                  | -7.90%  |
| Chow (2017)      | Charge           | Wrist | Controlled | Steps              | Visual Observation / Count             | Time: steps/3 min           | Walking: Treadmill              | steps/3 min 6.5 km/h 1.8 m/s                                 | -10.10% |
| Chow (2017)      | Charge           | Wrist | Controlled | Steps              | Visual Observation / Count             | Time: steps/3 min           | Jog: Treadmill                  | steps/3 min 8 km/h 2.2 m/s                                   | -3.60%  |
| Chow (2017)      | Charge           | Wrist | Controlled | Steps              | Visual Observation / Count             | Time: steps/3 min           | Jog: Treadmill                  | steps/3 min 10 km/h 2.8 m/s                                  | 0.30%   |
| Chow (2017)      | Charge           | Wrist | Controlled | Steps              | Visual Observation / Count             | Time: steps/3 min           | Jog: Treadmill                  | steps/3 min 12 km/h 3.3 m/s                                  | 0.00%   |
| Chow (2017)      | Flex             | Wrist | Controlled | Steps              | Visual Observation / Count             | Time: steps/3 min           | Walking: Treadmill              | steps/3 min 5 km/h 1.39 m/s                                  | -8.60%  |
| Chow (2017)      | Flex             | Wrist | Controlled | Steps              | Visual Observation / Count             | Time: steps/3 min           | Walking: Treadmill              | steps/3 min 6.5 km/h 1.8 m/s                                 | -11.90% |
| Chow (2017)      | Flex             | Wrist | Controlled | Steps              | Visual Observation / Count             | Time: steps/3 min           | Jog: Treadmill                  | steps/3 min 8 km/h 2.2 m/s                                   | -3.30%  |
| Chow (2017)      | Flex             | Wrist | Controlled | Steps              | Visual Observation / Count             | Time: steps/3 min           | Jog: Treadmill                  | steps/3 min 10 km/h 2.8 m/s                                  | 1.80%   |
| Chow (2017)      | Flex             | Wrist | Controlled | Steps              | Visual Observation / Count             | Time: steps/3 min           | Jog: Treadmill                  | steps/3 min 12 km/h 3.3 m/s                                  | -1.50%  |
| Chowdhury (2017) | Charge HR        | Wrist | Controlled | Energy Expenditure | Indirect calorimetry (COSMED K4b)      | kcal/min                    | ADL, Typing                     | 5 minutes, Seated typing on laptol                           | -5.96%  |
| Chowdhury (2017) | Charge HR        | Wrist | Controlled | Energy Expenditure | Indirect calorimetry (COSMED K4b)      | kcal/min                    | ADL, Dishwasher                 | 5 minutes, Loading and unloading                             | -8.94%  |
| Chowdhury (2017) | Charge HR        | Wrist | Controlled | Energy Expenditure | Indirect calorimetry (COSMED K4b)      | kcal/min                    | ADL, Sweeping                   | 5 minutes, Light objects across 3 m distance                 | 29.03%  |
| Chowdhury (2017) | Charge HR        | Wrist | Controlled | Energy Expenditure | Indirect calorimetry (COSMED K4b)      | kcal/min                    | ADL, Stairs                     | 5 minutes, Ascending and decending one flight                | -0.28%  |
| Chowdhury (2017) | Charge HR        | Wrist | Controlled | Energy Expenditure | Indirect calorimetry (COSMED K4b)      | kcal/min                    | Walk: Treadmill                 | 10 minutes, 1-1.3 m/s [4 or 4.8 km/h]                        | 69.66%  |
| Chowdhury (2017) | Charge HR        | Wrist | Controlled | Energy Expenditure | Indirect calorimetry (COSMED K4b)      | kcal/min                    | Loaded Walk - Carrying Two      | 10 minutes, 6 kg for females, 10 kg for males, shopping bags | 43.99%  |
| Chowdhury (2017) | Charge HR        | Wrist | Controlled | Energy Expenditure | Indirect calorimetry (COSMED K4b)      | kcal/min                    | Cycle (stationary)              | 10 minutes, 75 W for females, 100 W for males                | -52.55% |
| Chowdhury (2017) | Charge HR        | Wrist | Controlled | Energy Expenditure | Indirect calorimetry (COSMED K4b)      | kcal/min                    | Run - Treadmill                 | 10 minutes, 2.3 m/s [8.4 km/h]                               | 4.65%   |
| Cook (2017)      | Flex - Normal    | Wrist | Controlled | Sleep              | Polysomnography (Electrical Geodesics) | Min / night                 | Total Sleep Time                | 1-night, TST = Time in bed-time awake                        | 9.1%    |
| Cook (2017)      | Flex - Normal    | Wrist | Controlled | Sleep              | Polysomnography (Electrical Geodesics) | %                           | Sleep Efficiency (Total Sleep / | 1-night, SE = TST/time in bedd                               | 8.8%    |
| Cook (2017)      | Flex - Normal    | Wrist | Controlled | Sleep              | Polysomnography (Electrical Geodesics) | Min / night                 | Sleep Onset Latency             | 1-night, Bed onset to sleep onset                            | -11.6%  |
| Cook (2017)      | Flex - Normal    | Wrist | Controlled | Sleep              | Polysomnography (Electrical Geodesics) | Min / night                 | Wake after Sleep Onset          | 1-night, awake after sleep onset                             | -181.1% |
| Cook (2017)      | Flex - Sensitive | Wrist | Controlled | Sleep              | Polysomnography (Electrical Geodesics) | Min / night                 | Total Sleep Time                | 1-night, TST = Time in bed-time awake                        | -18.9%  |
| Cook (2017)      | Flex - Sensitive | Wrist | Controlled | Sleep              | Polysomnography (Electrical Geodesics) | %                           | Sleep Efficiency (Total Sleep / | 1-night, SE = TST/time in bedd                               | -19.0%  |
| Cook (2017)      | Flex - Sensitive | Wrist | Controlled | Sleep              | Polysomnography (Electrical Geodesics) | Min / night                 | Sleep Onset Latency             | 1-night, Bed onset to sleep onset                            | 59.9%   |
| Cook (2017)      | Flex - Sensitive | Wrist | Controlled | Sleep              | Polysomnography (Electrical Geodesics) | Min / night                 | Wake after Sleep Onset          | 1-night, awake after sleep onset                             | 109.5%  |
| Dannecker (2013) | Classic          | Hip   | Controlled | Energy Expenditure | Whole-room (Direct) Calorimetry        | Total EE (kcal / 3.5 hours) | ADLs and Physical Activity      | Random Assigned Activities - Fitbit measured                 | -27.29% |
| Diaz (2016)      | One              | Hip   | Controlled | Steps              | Visual Observation / Count             | Time: Steps / 6 min         | Jog: Treadmill                  | Jog 6 minutes 5.2 mph) (2.32 m/s)                            | -1.00%  |
| Diaz (2016)      | one              | Torso | Controlled | Steps              | Visual Observation / Count             | Time: Steps / 6 min         | Jog: Treadmill                  | Jog 6 minutes 5.2 mph) (2.32 m/s)                            | -0.20%  |
| Diaz (2016)      | flex             | Wrist | Controlled | Steps              | Visual Observation / Count             | Time: Steps / 6 min         | Walk: Treadmill                 | Walk 6 minutes 3.0 mph (1.34 m/s)                            | -10.00% |
| Diaz (2016)      | one              | Torso | Controlled | Steps              | Visual Observation / Count             | Time: Steps / 6 min         | Walk: Treadmill                 | Walk 6 minutes 1.9 mph (0.85 m/s).                           | -3.90%  |
| Diaz (2016)      | one              | Hip   | Controlled | Steps              | Visual Observation / Count             | Time: Steps / 6 min         | Walk: Treadmill                 | Walk 6 minutes 3.0 mph (1.34 m/s)                            | -0.70%  |
| Diaz (2016)      | one              | Torso | Controlled | Steps              | Visual Observation / Count             | Time: Steps / 6 min         | Walk: Treadmill                 | Walk 6 minutes 3.0 mph (1.34 m/s)                            | -0.60%  |
| Diaz (2016)      | one              | hip   | Controlled | Steps              | Visual Observation / Count             | Time: Steps / 6 min         | Walk: Treadmill                 | Walk 6 minutes 4.0 mph) (1.79 m/s)                           | -0.50%  |
| Diaz (2016)      | one              | Torso | Controlled | Steps              | Visual Observation / Count             | Time: Steps / 6 min         | Walk: Treadmill                 | Walk 6 minutes 4.0 mph) (1.79 m/s)                           | -0.50%  |
| Diaz (2016)      | flex             | wrist | Controlled | Steps              | Visual Observation / Count             | Time: Steps / 6 min         | Jog: Treadmill                  | Walk 6 minutes 5.2 mph) (2.32 m/s)                           | 2.10%   |
| Diaz (2016)      | one              | Hip   | Controlled | Steps              | Visual Observation / Count             | Time: Steps / 6 min         | Walk: Treadmill                 | Walk 6 minutes 1.9 mph (0.85 m/s).                           | -2.00%  |
| Diaz (2016)      | flex             | Wrist | Controlled | Steps              | Visual Observation / Count             | Time: Steps / 6 min         | Walk: Treadmill                 | Walk 6 minutes 1.9 mph (0.85 m/s).                           | -15.30% |
| Diaz (2016)      | flex             | Wrist | Controlled | Steps              | Visual Observation / Count             | Time: Steps / 6 min         | Walk: Treadmill                 | Walk 6 minutes 4.0 mph) (1.79 m/s)                           | -11.60% |

|                  |           |       |             |                    |                                                  |                           |                               |                                                                   |         |
|------------------|-----------|-------|-------------|--------------------|--------------------------------------------------|---------------------------|-------------------------------|-------------------------------------------------------------------|---------|
| Diaz (2016)      | Flex      | wrist | Controlled  | Energy Expenditure | Indirect calorimetry (Ultima CPX MedGraphics)    | EE (kcal/1-min)           | Walk: Treadmill               | slow walk (1.9 mph (0.85 m/s).                                    | 85.71%  |
| Diaz (2016)      | One       | Torso | Controlled  | Energy Expenditure | Indirect calorimetry (Ultima CPX MedGraphics)    | EE (kcal/1-min)           | Walk: Treadmill               | slow walk (1.9 mph (0.85 m/s).                                    | -10.71% |
| Diaz (2016)      | One       | hip   | Controlled  | Energy Expenditure | Indirect calorimetry (Ultima CPX MedGraphics)    | EE (kcal/1-min)           | Walk: Treadmill               | slow walk (1.9 mph (0.85 m/s).                                    | -7.14%  |
| Diaz (2016)      | Flex      | wrist | Controlled  | Energy Expenditure | Indirect calorimetry (Ultima CPX MedGraphics)    | EE (kcal/1-min)           | Walk: Treadmill               | moderate walk (3.0 mph (1.34 m/s)                                 | 68.42%  |
| Diaz (2016)      | One       | Torso | Controlled  | Energy Expenditure | Indirect calorimetry (Ultima CPX MedGraphics)    | EE (kcal/1-min)           | Walk: Treadmill               | moderate walk (3.0 mph (1.34 m/s)                                 | 15.79%  |
| Diaz (2016)      | One       | hip   | Controlled  | Energy Expenditure | Indirect calorimetry (Ultima CPX MedGraphics)    | EE (kcal/1-min)           | Walk: Treadmill               | moderate walk (3.0 mph (1.34 m/s)                                 | 7.89%   |
| Diaz (2016)      | Flex      | wrist | Controlled  | Energy Expenditure | Indirect calorimetry (Ultima CPX MedGraphics)    | EE (kcal/1-min)           | Walk: Treadmill               | brisk walk (4.0 mph) (1.79 m/s)                                   | 28.57%  |
| Diaz (2016)      | One       | Torso | Controlled  | Energy Expenditure | Indirect calorimetry (Ultima CPX MedGraphics)    | EE (kcal/1-min)           | Walk: Treadmill               | brisk walk (4.0 mph) (1.79 m/s)                                   | 14.29%  |
| Diaz (2016)      | One       | hip   | Controlled  | Energy Expenditure | Indirect calorimetry (Ultima CPX MedGraphics)    | EE (kcal/1-min)           | Walk: Treadmill               | brisk walk (4.0 mph) (1.79 m/s)                                   | 7.14%   |
| Diaz (2016)      | Flex      | wrist | Controlled  | Energy Expenditure | Indirect calorimetry (Ultima CPX MedGraphics)    | EE (kcal/1-min)           | Jog: Treadmill                | Jog (5.2 mph) (2.32 m/s)                                          | 27.71%  |
| Diaz (2016)      | One       | Torso | Controlled  | Energy Expenditure | Indirect calorimetry (Ultima CPX MedGraphics)    | EE (kcal/1-min)           | Jog: Treadmill                | Jog (5.2 mph) (2.32 m/s)                                          | 14.46%  |
| Diaz (2016)      | One       | hip   | Controlled  | Energy Expenditure | Indirect calorimetry (Ultima CPX MedGraphics)    | EE (kcal/1-min)           | Jog: Treadmill                | Jog (5.2 mph) (2.32 m/s)                                          | -4.82%  |
| Dominick (2016)  | Flex      | Wrist | Freeliving  | Steps              | Accelerometry (Actigraph GT3X)                   | Steps / day               | Normal Daility Activities     | 14 days (2 7-day sessions, waking hours)                          | 6.7%    |
| Dondzila (2016)  | Charge    | Wrist | Controlled  | Energy Expenditure | Indirect calorimetry (TrueOne 2400 metabolic)    | Total EE (kcal / 5 min)   | Walk: Treadmill               | walking, 80.5 m/min [1.34 m/s]                                    | 21.40%  |
| Dondzila (2016)  | Charge    | Wrist | Controlled  | Energy Expenditure | Indirect calorimetry (TrueOne 2400 metabolic)    | Total EE (kcal / 5 min)   | Walk: Treadmill               | walking, 107.3 m/min [1.79 m/s]                                   | -11.20% |
| Dondzila (2016)  | Charge    | Wrist | Controlled  | Energy Expenditure | Indirect calorimetry (TrueOne 2400 metabolic)    | Total EE (kcal / 5 min)   | Jog: Treadmill                | Jog 134.1 m/min [2.24 m/s]                                        | -13.73% |
| Dondzila (2016)  | Charge    | Wrist | Controlled  | Energy Expenditure | Indirect calorimetry (TrueOne 2400 metabolic)    | Total EE (kcal / 5 min)   | Run: Treadmill                | Run 160.9 m/min (6.0 mph) [2.68 m/s]                              | -22.45% |
| Dooley (2017)    | Charge HR | Wrist | Controlled  | Energy Expenditure | Indirect calorimetry (ParvoMedics TrueOne 2400)  | kcal/10 min               | Baseline/Rest                 | 10 minutes, Rest                                                  | -9.02%  |
| Dooley (2017)    | Charge HR | Wrist | Controlled  | Energy Expenditure | Indirect calorimetry (ParvoMedics TrueOne 2400)  | kcal/4 min                | Walk Treadmill: 2.5mph 1.12   | 4 minutes, 1.11 m/s                                               | 82.27%  |
| Dooley (2017)    | Charge HR | Wrist | Controlled  | Energy Expenditure | Indirect calorimetry (ParvoMedics TrueOne 2400)  | kcal/4 min                | Walk Treadmill: 3.5 mph 1.56  | 4 minutes, 1.56 m/s                                               | 42.20%  |
| Dooley (2017)    | Charge HR | Wrist | Controlled  | Energy Expenditure | Indirect calorimetry (ParvoMedics TrueOne 2400)  | kcal/4 min                | Walk Treadmill: 5.5 mph 2.5   | 4 minutes, 2.46 m/s                                               | 2.84%   |
| Dooley (2017)    | Charge HR | Wrist | Controlled  | Energy Expenditure | Indirect calorimetry (ParvoMedics TrueOne 2400)  | kcal/10 min               | Recovery/Rest                 | 10 minutes, Rest                                                  | 18.96%  |
| Farina (2017)    | Charge HR | Wrist | Freeliving  | Steps              | Accelerometry (Actigraph GT3X))                  | Steps / day               | Normal Daility Activities     | 8 days, waking hours                                              | -36%    |
| Ferguson (2012)  | Zip       | Hip   | Freeliving  | Time in Activity   | Accelerometry (Actigraph GT3X))                  | MVPA (Mins / Day)         | 2-Day, 48 hour (24 hour wear) | AG not defined ZIP sum of vigorous and moderate minutes.          | 146%    |
| Ferguson (2012)  | One       | Hip   | Freeliving  | Time in Activity   | Accelerometry (Actigraph GT3X))                  | MVPA (Mins / Day)         | 2-Day, 48 hour (24 hour wear) | AG not defined ONE sum of very active and moderate minutes.       | 113%    |
| Ferguson (2012)  | Zip       | Hip   | Free Living | Energy Expenditure | Accelerometry (SenseWear model MF)               | Total EE (kcal / day)     | Normal Daily Activities       | 2-Days                                                            | -16.5%  |
| Ferguson (2012)  | One       | Hip   | Free Living | Energy Expenditure | Accelerometry (SenseWear model MF)               | Total EE (kcal / day)     | Normal Daily Activities       | 2-Days                                                            | -15.8%  |
| Ferguson (2015)  | Zip       | Hip   | Freeliving  | Steps              | Accelerometry (Actigraph GT3X))                  | Steps / day               | Normal Daility Activities     | 2-Day, 48 hour (24 hour wear)                                     | 4.4%    |
| Ferguson (2015)  | One       | Hip   | Freeliving  | Steps              | Accelerometry (Actigraph GT3X))                  | Steps / day               | Normal Daility Activities     | 2-Day, 48 hour (24 hour wear)                                     | 5.6%    |
| Ferguson (2015)  | One       | Wrist | Free Living | Sleep              | Accelerometry (SW Mini)                          | Total Bed Time (min)      | Home sleep                    | 2-nights                                                          | 3.80%   |
| Floegel (2016)   | One       | Hip   | Controlled  | Steps              | Visual Observation / Count                       | Distance: Steps / 100 m   | Walk: Hallway                 | 100m self-selected pace (walker user)                             | -23.25% |
| Floegel (2016)   | One       | Hip   | Controlled  | Steps              | Visual Observation / Count                       | Distance: Steps / 100 m   | Walk: Hallway                 | 100m self-selected pace (impaired)                                | -1.71%  |
| Floegel (2016)   | One       | Hip   | Controlled  | Steps              | Visual Observation / Count                       | Distance: Steps / 100 m   | Walk: Hallway                 | 100m self-selected pace (cane-users)                              | -11.48% |
| Floegel (2016)   | Flex      | Wrist | Controlled  | Steps              | Visual Observation / Count                       | Distance: Steps / 100 m   | Walk: Hallway                 | 100m self-selected pace (walker user)                             | -57.40% |
| Floegel (2016)   | Flex      | Wrist | Controlled  | Steps              | Visual Observation / Count                       | Distance: Steps / 100 m   | Walk: Hallway                 | 100m self-selected pace (cane-users)                              | -22.88% |
| Floegel (2016)   | Flex      | Wrist | Controlled  | Steps              | Visual Observation / Count                       | Distance: Steps / 100 m   | Walk: Hallway                 | 100m self-selected pace (impaired)                                | -16.31% |
| Floegel (2016)   | One       | Hip   | Controlled  | Steps              | Visual Observation / Count                       | Distance: Steps / 100 m   | Walk: Hallway                 | 100m self-selected pace (non-impaired)                            | -2.59%  |
| Floegel (2016)   | Flex      | Wrist | Controlled  | Steps              | Visual Observation / Count                       | Distance: Steps / 100 m   | Walk: Hallway                 | 100m self-selected pace (non-impaired)                            | -26.94% |
| Fokkema (2016)   | Charge HR | Wrist | Controlled  | Steps              | Visual Observation / Count                       | Time: Steps/ 30 min       | Jog: Treadmill                | fast: 6.4 km/h, 1.78 m/s                                          | 5.18%   |
| Fokkema (2016)   | Charge HR | Wrist | Controlled  | Steps              | Visual Observation / Count                       | Time: Steps/ 30 min       | Walk: Treadmill               | comfortable: 4.8 km/h, 1.33 m/s                                   | 1.98%   |
| Fokkema (2016)   | Charge HR | Wrist | Controlled  | Steps              | Visual Observation / Count                       | Time: Steps/ 30 min       | Walk: Treadmill               | slow: 3.2 km/h, 0.89 m/s                                          | -0.74%  |
| Fulk (2014)      | Ultra     | Hip   | Controlled  | Steps              | Visual Observation / Count                       | Time: Steps / 2 min       | Walk: Hallway                 | 2 Minute walk test (steps / 2 minutes) - Stroke (n=30)            | -8.35%  |
| Fulk (2014)      | Ultra     | Hip   | Controlled  | Steps              | Visual Observation / Count                       | Time: steps / 2 min       | Walk: Hallway                 | 2 Minute walk test (steps / 2 minutes) - Able (n=20)              | -0.15%  |
| Gomersall (2016) | One       | Hip   | Freeliving  | Steps              | Accelerometry (Actigraph GT3X)                   | Steps / day               | Normal Daility Activities     | 9.6 days (waking hours)                                           | 7.9%    |
| Gomersall (2016) | One       | hip   | Freeliving  | Time in Activity   | Accelerometry (Actigraph GT3X)                   | MVPA (Min / Day)          | 9.6 days (waking hours)       | MVPA: > = 2020 counts / minute. FB Very Active minutes            | 76%     |
| Gusmer (2014)    | Ultra     | Hip   | Controlled  | Energy Expenditure | Indirect calorimetry (Ultima CPX metabolic cart) | Total EE (kcal / 30-min)  | Walk: Treadmill               | Slow Walk (-10% of their self-selected comfortable walking speed) | -12.78% |
| Gusmer (2014)    | Ultra     | Hip   | Controlled  | Energy Expenditure | Indirect calorimetry (Ultima CPX metabolic cart) | Total EE (kcal / 30-min)  | Walk: Treadmill               | Fast Walk (+10% of their self-selected comfortable walking speed) | -17.23% |
| Hargens (2017)   | Charge    | Wrist | Freeliving  | Steps              | Accelerometry (Actigraph GT3X))                  | Steps / day               | Normal Daility Activities     | 7 days, waking hours                                              | 17.9%   |
| Hargens (2017)   | One       | Waist | Freeliving  | Steps              | Accelerometry (Actigraph GT3X))                  | Steps / day               | Normal Daility Activities     | 7 days, waking hours                                              | 10.2%   |
| Huang, (2016)    | One       | Waist | Controlled  | Steps              | Visual Observation / Count                       | Stair: Steps / 176 stairs | Stair: Down                   | Downstairs (176 steps) self selected speed                        | -6.00%  |

|                |      |             |            |                    |                                    |                           |                             |                                                                          |         |
|----------------|------|-------------|------------|--------------------|------------------------------------|---------------------------|-----------------------------|--------------------------------------------------------------------------|---------|
| Huang, (2016)  | Zip  | Waist       | Controlled | Steps              | Visual Observation / Count         | Stair: Steps / 176 stairs | Stair: Down                 | Downstairs (176 steps) self selected speed                               | -5.30%  |
| Huang, (2016)  | One  | waist       | Controlled | Steps              | Visual Observation / Count         | Stair: Steps / 176 stairs | Stair: Up                   | Upstairs (176 steps) self selected speed                                 | -2.30%  |
| Huang, (2016)  | Zip  | Waist       | Controlled | Steps              | Visual Observation / Count         | Stair: Steps / 176 stairs | Stair: Up                   | Upstairs (176 steps) self selected speed                                 | -1.10%  |
| Huang, (2016)  | Flex | Wrist       | Controlled | Steps              | Visual Observation / Count         | Stair: Steps / 176 stairs | Stair: Up                   | Upstairs (176 steps) self selected speed                                 | -7.90%  |
| Huang, (2016)  | Flex | Wrist       | Controlled | Steps              | Visual Observation / Count         | Stair: Steps / 176 stairs | Stair: Down                 | Downstairs (176 steps) self selected speed                               | -7.10%  |
| Huang, (2016)  | Zip  | Waist       | Controlled | Steps              | Visual Observation / Count         | Time: Steps / 3 min       | Walk: Treadmill             | (1.33 m/s), 3 min                                                        | -5.80%  |
| Huang, (2016)  | Zip  | Waist       | Controlled | Steps              | Visual Observation / Count         | Time: Steps / 3 min       | Walk: Treadmill             | (1.78 m/s), 3 min                                                        | -3.40%  |
| Huang, (2016)  | One  | Waist       | Controlled | Steps              | Visual Observation / Count         | Time: Steps / 3 min       | Walk: Treadmill             | (1.78 m/s), 3 min                                                        | -1.50%  |
| Huang, (2016)  | One  | Waist       | Controlled | Steps              | Visual Observation / Count         | Time: Steps / 3 min       | Walk: Treadmill             | (1.33 m/s), 3 min                                                        | -1.20%  |
| Huang, (2016)  | One  | Waist       | Controlled | Steps              | Visual Observation / Count         | Time: Steps / 3 min       | Walk: Treadmill             | (0.9 m/s), 3 min                                                         | -3.80%  |
| Huang, (2016)  | Zip  | Waist       | Controlled | Steps              | Visual Observation / Count         | Time: Steps / 3 min       | Walk: Treadmill             | (0.9 m/s), 3 min                                                         | -2.70%  |
| Huang, (2016)  | One  | Waist       | Controlled | Steps              | Visual Observation / Count         | Distance: Steps / 400 m   | Walk: outside, paved road   | 400m, self selected speed                                                | -1.00%  |
| Huang, (2016)  | Zip  | Waist       | Controlled | Steps              | Visual Observation / Count         | Distance: Steps / 400 m   | Walk: outside, paved road   | 400m, self selected speed                                                | -0.10%  |
| Huang, (2016)  | Flex | Wrist       | Controlled | Steps              | Visual Observation / Count         | Distance: Steps / 400 m   | Walk: outside, paved road   | 400m, self selected speed                                                | -11.70% |
| Huang, (2016)  | Flex | Wrist       | Controlled | Steps              | Visual Observation / Count         | Time: Steps / 3 min       | Walk: Treadmill             | (1.78 m/s), 3 min                                                        | -8.90%  |
| Huang, (2016)  | Flex | Wrist       | Controlled | Steps              | Visual Observation / Count         | Time: Steps / 3 min       | Walk: Treadmill             | (1.33 m/s), 3 min                                                        | -5.10%  |
| Huang, (2016)  | Flex | Wrist       | Controlled | Steps              | Visual Observation / Count         | Time: Steps / 3 min       | Walk: Treadmill             | (0.9 m/s), 3 min                                                         | -6.54%  |
| Huang, (2016)  | One  | Waist       | Controlled | Distance           | Treadmill Distance                 | Distance / 3 min          | Walk: Treadmill             | (0.9 m/s), 3 min                                                         | 31.20%  |
| Huang, (2016)  | Zip  | Waist       | Controlled | Distance           | Treadmill Distance                 | Distance / 3 min          | Walk: Treadmill             | (0.9 m/s), 3 min                                                         | 29.90%  |
| Huang, (2016)  | Flex | Wrist       | Controlled | Distance           | Treadmill Distance                 | Distance / 3 min          | Walk: Treadmill             | (0.9 m/s), 3 min                                                         | 26.80%  |
| Huang, (2016)  | One  | Waist       | Controlled | Distance           | Treadmill Distance                 | Distance / 3 min          | Walk: Treadmill             | (1.33 m/s), 3 min                                                        | 3.70%   |
| Huang, (2016)  | Zip  | Waist       | Controlled | Distance           | Treadmill Distance                 | Distance / 3 min          | Walk: Treadmill             | (1.33 m/s), 3 min                                                        | -1.80%  |
| Huang, (2016)  | Flex | Wrist       | Controlled | Distance           | Treadmill Distance                 | Distance / 3 min          | Walk: Treadmill             | (1.33 m/s), 3 min                                                        | -2.60%  |
| Huang, (2016)  | One  | Waist       | Controlled | Distance           | Treadmill Distance                 | Distance / 3 min          | Walk: Treadmill             | (1.78 m/s), 3 min                                                        | -12.10% |
| Huang, (2016)  | Zip  | Waist       | Controlled | Distance           | Treadmill Distance                 | Distance / 3 min          | Walk: Treadmill             | (1.78 m/s), 3 min                                                        | -7.70%  |
| Huang, (2016)  | Flex | Wrist       | Controlled | Distance           | Treadmill Distance                 | Distance / 3 min          | Walk: Treadmill             | (1.78 m/s), 3 min                                                        | -19.60% |
| Huang, (2016)  | One  | Waist       | Controlled | Distance           | Measured Distance                  | Distance: 400 m           | Walk: outside, paved road   | 400 m, self selected speed                                               | 5.40%   |
| Huang, (2016)  | Zip  | Waist       | Controlled | Distance           | Measured Distance                  | Distance: 400 m           | Walk: outside, paved road   | 400 m, self selected speed                                               | 4.10%   |
| Huang, (2016)  | Flex | Waist       | Controlled | Distance           | Measured Distance                  | Distance: 400 m           | Walk: outside, paved road   | 400 m, self selected speed                                               | 12.80%  |
| Hui (2017)     | One  | Ankle (non) | Freeliving | Steps              | Accelerometry (Actical)            | Steps / day               | Normal Daility Activities   | 3 days (1 weekday, 2 weekend), 24 hours                                  | -5%     |
| Hui (2017)     | One  | Ankle (non) | Freeliving | Time in Activity   | Accelerometry (Actical)            | Sedentary (min / day)     | 3 days ( 1 weekday, 2       | AC: sed 1 MET, light <3 MET, Mod 3-6 MET, Vig >6 METS                    | -4%     |
| Hui (2017)     | One  | Ankle (non) | Freeliving | Time in Activity   | Accelerometry (Actical)            | Light (Mins / Day)        | 3 days ( 1 weekday, 2       | AC: sed 1 MET, light <3 MET, Mod 3-6 MET, Vig >6 METS                    | 47%     |
| Hui (2017)     | One  | Ankle (non) | Freeliving | Time in Activity   | Accelerometry (Actical)            | Moderate (Min / Day),     | 3 days ( 1 weekday, 2       | AC: sed 1 MET, light <3 MET, Mod 3-6 MET, Vig >6 METS                    | -74%    |
| Hui (2017)     | One  | Ankle (non) | Freeliving | Time in Activity   | Accelerometry (Actical)            | Vigorous (Min / Day),     | 3 days ( 1 weekday, 2       | AC: sed 1 MET, light <3 MET, Mod 3-6 MET, Vig >6 METS                    | 1900%   |
| Imboden (2017) | Zip  | waist       | Controlled | Steps              | Visual Observation / Count         | Time: Steps / 80 min      | Mixed Progressive Intensity | total steps/80 min protocol (semi structured, >12 out of 21 choices for: | -26.28% |
| Imboden (2017) | One  | waist       | Controlled | Steps              | Visual Observation / Count         | Time: Steps / 80 min      | Mixed Progressive Intensity | total steps/80 min protocol (semi structured, >12 out of 21 choices for: | -26.09% |
| Imboden (2017) | Flex | Wrist       | Controlled | Steps              | Visual Observation / Count         | Time: Steps / 80 min      | Mixed Progressive Intensity | total steps/80 min protocol (semi structured, >12 out of 21 choices for: | -23.06% |
| Imboden (2017) | Flex | Wrist       | Controlled | Energy Expenditure | Indirect calorimetry (COSMED Srl): | kcal/80 min               | ADLs protocol - Progressive | Progressive Intensity ADL simulation (sedentary activities, household    | -13.27% |
| Imboden (2017) | One  | Waist       | Controlled | Energy Expenditure | Indirect calorimetry (COSMED Srl): | kcal/80 min               | ADLs protocol - Progressive | Progressive Intensity ADL simulation (sedentary activities, household    | -15.99% |
| Imboden (2017) | Zip  | Waist       | Controlled | Energy Expenditure | Indirect calorimetry (COSMED Srl): | kcal/80 min               | ADLs protocol - Progressive | Progressive Intensity ADL simulation (sedentary activities, household    | -26.19% |
| Klassen (2015) | One  | Ankle       | Controlled | Steps              | Visual Observation / Count         | Distance: Steps / 15 m    | Walk: Hallway               | 15 m walk, 0.9m/s                                                        | -3.45%  |
| Klassen (2015) | One  | Ankle       | Controlled | Steps              | Visual Observation / Count         | Distance: Steps / 15 m    | Walk: Hallway               | 15 m walk, 0.8m/s                                                        | 0.00%   |
| Klassen (2015) | One  | Waist       | Controlled | Steps              | Visual Observation / Count         | Distance: Steps / 15 m    | Walk: Hallway               | 15 m walk, 0.8m/s                                                        | -9.68%  |
| Klassen (2015) | One  | Waist       | Controlled | Steps              | Visual Observation / Count         | Distance: Steps / 15 m    | Walk: Hallway               | 15 m walk, 0.9m/s                                                        | -6.90%  |
| Klassen (2015) | One  | Ankle       | Controlled | Steps              | Visual Observation / Count         | Distance: Steps / 15 m    | Walk: Hallway               | 15 m walk, 0.3m/s                                                        | -9.26%  |
| Klassen (2015) | One  | Ankle       | Controlled | Steps              | Visual Observation / Count         | Distance: Steps / 15 m    | Walk: Hallway               | 15 m walk, 0.7m/s                                                        | -3.03%  |
| Klassen (2015) | One  | Ankle       | Controlled | Steps              | Visual Observation / Count         | Distance: Steps / 15 m    | Walk: Hallway               | 15 m walk, 0.4m/s                                                        | -2.17%  |
| Klassen (2015) | One  | Ankle       | Controlled | Steps              | Visual Observation / Count         | Distance: Steps / 15 m    | Walk: Hallway               | 15 m walk, 0.5m/s                                                        | 0.00%   |
| Klassen (2015) | One  | Ankle       | Controlled | Steps              | Visual Observation / Count         | Distance: Steps / 15 m    | Walk: Hallway               | 15 m walk, 0.6m/s                                                        | 0.00%   |
| Klassen (2015) | One  | Waist       | Controlled | Steps              | Visual Observation / Count         | Distance: Steps / 15 m    | Walk: Hallway               | 15 m walk, 0.3m/s                                                        | -81.48% |

|                    |               |       |             |                    |                                      |                          |                                 |                                                                       |         |
|--------------------|---------------|-------|-------------|--------------------|--------------------------------------|--------------------------|---------------------------------|-----------------------------------------------------------------------|---------|
| Klassen (2015)     | One           | Waist | Controlled  | Steps              | Visual Observation / Count           | Distance: Steps / 15 m   | Walk: Hallway                   | 15 m walk, 0.4m/s                                                     | -56.52% |
| Klassen (2015)     | One           | Waist | Controlled  | Steps              | Visual Observation / Count           | Distance: Steps / 15 m   | Walk: Hallway                   | 15 m walk, 0.5m/s                                                     | -35.00% |
| Klassen (2015)     | One           | Waist | Controlled  | Steps              | Visual Observation / Count           | Distance: Steps / 15 m   | Walk: Hallway                   | 15 m walk, 0.6m/s                                                     | -13.89% |
| Klassen (2015)     | One           | Waist | Controlled  | Steps              | Visual Observation / Count           | Distance: Steps / 15 m   | Walk: Hallway                   | 15 m walk, 0.7m/s                                                     | -12.12% |
| Klassen (2015)     | Zip           | Hip   | Controlled  | Steps              | Visual Observation / Count           | Time: Step / 30 min      | Walk: Treadmill                 | 30 minute (x2)s, 4.3 km / hr [1.2 m/s]                                | -0.33%  |
| Klassen (2015)     | Flex          | Wrist | Controlled  | Steps              | Visual Observation / Count           | Time: Step / 30 min      | Walk: Treadmill                 | 30 minute (x2)s, 4.3 km / hr [1.2 m/s]                                | -5.67%  |
| Kooiman (2015)     | Flex          | Wrist | Freeliving  | Steps              | Accelerometry (ActivePAL)            | Steps / 7.5 hr           | Normal Daility Activities       | 9 am to 4:40 pm, 1-day                                                | 7.4%    |
| Kooiman (2015)     | Zip           | Hip   | Freeliving  | Steps              | Accelerometry (ActivePAL)            | Steps / 7.5 hr           | Normal Daility Activities       | 9 am to 4:40 pm, 1-day                                                | 1.2%    |
| Lee (2014)         | One           | Hip   | Controlled  | Energy Expenditure | Indirect calorimetry (Oxycon Mobile) | Total EE (kcal / 69-min) | Physical Activity: Progressive  | Sedentary x4, walking x4, running x2, MVPA x6                         | -7.3%   |
| Lee (2014)         | Zip           | Hip   | Controlled  | Energy Expenditure | Indirect calorimetry (Oxycon Mobile) | Total EE (kcal / 69-min) | Physical Activity: Progressive  | Sedentary x4, walking x4, running x2, MVPA x5                         | 3.70%   |
| Lee (2017)         | Charge        | Wrist | Free Living | Sleep              | Accelerometry (Actiwatch)            | Total Bed Time (min)     | Home sleep                      | 13-days                                                               | -0.4%   |
| Lee (2017)         | Charge        | Wrist | Free Living | Sleep              | Accelerometry (Actiwatch)            | Total Sleep Time (min)   | Home sleep                      | 13-days                                                               | 5.8%    |
| Mantura (2016)     | Flex - Normal | Wrist | Controlled  | Sleep              | Polysomnography (Aura system)        | Min / night              | Total Sleep                     | 1-night, Total Minutes defined as sleep                               | 3.0%    |
| Mantura (2016)     | Flex - Normal | Wrist | Controlled  | Sleep              | Polysomnography (Aura system)        | %                        | Sleep Efficiency (Total Sleep / | 1-night, Total minutes of sleep / total minutes in bed                | 11.6%   |
| Middelweerd (2017) | One           | Hip   | Freeliving  | Steps              | Accelerometry (Actigraph GT3X)       | Steps / day              | Normal Daility Activities       | 7 days, waking hours                                                  | 8.9%    |
| Middelweerd (2017) | One           | Hip   | Freeliving  | Time in Activity   | Accelerometry (Actigraph GT3X)       | Moderate (Min / Day),    | 7 days, waking hours            | AG: < 100, 100-2019, 2020-5998, >=5999; MVPA >=2020                   | 124%    |
| Middelweerd (2017) | One           | Hip   | Freeliving  | Time in Activity   | Accelerometry (Actigraph GT3X)       | Vigorous (Min / Day)     | 7 days, waking hours            | AG: < 100, 100-2019, 2020-5998, >=5999; MVPA >=2020                   | 358%    |
| Middelweerd (2017) | One           | Hip   | Freeliving  | Time in Activity   | Accelerometry (Actigraph GT3X)       | MVPA (Mins / Day)        | 7 days, waking hours            | AG: < 100, 100-2019, 2020-5998, >=5999; MVPA >=2020                   | 150%    |
| Modave (2017)      | Surge         | Wrist | Controlled  | Steps              | Visual Observation / Count           | Number: #/1000           | Walking: Hallway                | 1000 steps, 0.89 m/s to 0.34 m/s (self-selected), age 18-39           | -4.03%  |
| Modave (2017)      | Surge         | Wrist | Controlled  | Steps              | Visual Observation / Count           | Number: #/1000           | Walking: Hallway                | 1000 steps, 0.89 m/s to 0.34 m/s (self-selected), age 40-64           | -5.61%  |
| Montes (2017)      | Flex          | Wrist | Controlled  | Steps              | Visual Observation / Count           | Time: Steps/3 min        | Walking: Treadmill              | steps/3 min, 1.5 mph, 0.67 m/s                                        | -14.13% |
| Montes (2017)      | Flex          | Wrist | Controlled  | Steps              | Visual Observation / Count           | Time: Steps/3 min        | Walking: Treadmill              | steps/3 min, 2.5 mph, 1.12 m/s                                        | -2.71%  |
| Montes (2017)      | Flex          | Wrist | Controlled  | Steps              | Visual Observation / Count           | Time: Steps/3 min        | Walking: Treadmill              | steps/3 min, 3.5 mph, 1.56 m/s                                        | -3.68%  |
| Montes (2017)      | Flex          | Wrist | Controlled  | Energy Expenditure | Indirect calorimetry (MOXUS Srl):    | kcal/3 min               | Walk: Treadmill                 | 0.67 m/s (Slow Walk) [1.5 mph]                                        | 63.28%  |
| Montes (2017)      | Flex          | Wrist | Controlled  | Energy Expenditure | Indirect calorimetry (MOXUS Srl):    | kcal/3 min               | Walk: Treadmill                 | 1.11 m/s (normal walk) [2.5 mph]                                      | 73.25%  |
| Montes (2017)      | Flex          | Wrist | Controlled  | Energy Expenditure | Indirect calorimetry (MOXUS Srl):    | kcal/3 min               | Walk: Treadmill                 | 1.56 m/s (normal walk) [3.5 mph]                                      | 39.99%  |
| Montgomery (2012)  | Likely One    | Wrist | Controlled  | Sleep              | Polysomnography (Embla Systems)      | Min / night              | Total Sleep Time                | 1-night, TST = Time in bed-time awake                                 | 18.1%   |
| Montgomery (2012)  | Likely One    | Wrist | Controlled  | Sleep              | Polysomnography (Embla Systems)      | %                        | Sleep Efficiency (Total Sleep / | 1-night, SE = TST/time in bedd                                        | 18.2%   |
| Montoye (2017)     | Charge HR     | Wrist | Controlled  | Energy Expenditure | Indirect Calorimetry (TrueOne 2400)  | kcal/1 min (x5)          | Lie down                        | Lie down                                                              | -5.26%  |
| Montoye (2017)     | Charge HR     | Wrist | Controlled  | Energy Expenditure | Indirect Calorimetry (TrueOne 2400)  | kcal/1 min (x5)          | Sit                             | Sit                                                                   | 1.41%   |
| Montoye (2017)     | Charge HR     | Wrist | Controlled  | Energy Expenditure | Indirect Calorimetry (TrueOne 2400)  | kcal/1 min (x5)          | Stand                           | Stand                                                                 | 0.00%   |
| Montoye (2017)     | Charge HR     | Wrist | Controlled  | Energy Expenditure | Indirect Calorimetry (TrueOne 2400)  | kcal/1 min (x5)          | Walk: Treadmill                 | 0.89 m/s                                                              | 4.68%   |
| Montoye (2017)     | Charge HR     | Wrist | Controlled  | Energy Expenditure | Indirect Calorimetry (TrueOne 2400)  | kcal/1 min (x5)          | Walk Incline: Treadmill         | 0.89 m/s 5% grade                                                     | 9.29%   |
| Montoye (2017)     | Charge HR     | Wrist | Controlled  | Energy Expenditure | Indirect Calorimetry (TrueOne 2400)  | kcal/1 min (x5)          | Walk Incline: Treadmill         | 0.89 m/s 10% grade                                                    | 10.03%  |
| Montoye (2017)     | Charge HR     | Wrist | Controlled  | Energy Expenditure | Indirect Calorimetry (TrueOne 2400)  | kcal/1 min (x5)          | Walk: Treadmill                 | 1.34 m/s 0% grade                                                     | 4.93%   |
| Montoye (2017)     | Charge HR     | Wrist | Controlled  | Energy Expenditure | Indirect Calorimetry (TrueOne 2400)  | kcal/1 min (x5)          | Walk Incline: Treadmill         | 1.34 m/s 5% grade                                                     | 9.24%   |
| Montoye (2017)     | Charge HR     | Wrist | Controlled  | Energy Expenditure | Indirect Calorimetry (TrueOne 2400)  | kcal/1 min (x5)          | Walk: Treadmill                 | 1.56 m/s to 1.8 m/s                                                   | 7.60%   |
| Montoye (2017)     | Charge HR     | Wrist | Controlled  | Energy Expenditure | Indirect Calorimetry (TrueOne 2400)  | kcal/1 min (x5)          | Jog                             | 2.24/4.5 m/s                                                          | 12.83%  |
| Montoye (2017)     | Charge HR     | Wrist | Controlled  | Energy Expenditure | Indirect Calorimetry (TrueOne 2400)  | kcal/1 min (x5)          | Cycle                           | 75/150 W                                                              | 8.41%   |
| Murakami (2016)    | Flex          | Wrist | Metabolic   | Energy Expenditure | Whole-room (Direct) Calorimetry      | Total EE (kcal / day)    | Normal Daily Activities:        | 3 meals, deskwork, watching TV, housework, treadmill                  | 6.03%   |
| Murakami (2016)    | Flex          | Wrist | Free Living | Energy Expenditure | Doubly Labeled Water                 | Total EE (kcal / day)    | Normal Daily Activities         | 15 -Days                                                              | -7.4%   |
| Nelson (2016)      | One           | Hip   | Controlled  | Steps              | Visual Observation / Count           | Time: Steps / 20 min     | ADL                             | Household activities (4 x 5 min)                                      | -63.50% |
| Nelson (2016)      | Zip           | Hip   | Controlled  | Steps              | Visual Observation / Count           | Time: Steps / 20 min     | ADL                             | Household activities (4 x 5 min)                                      | -62.60% |
| Nelson (2016)      | Flex          | Wrist | Controlled  | Steps              | Visual Observation / Count           | Time: Steps / 20 min     | ADL                             | Household activities (4 x 5 min)                                      | -8.10%  |
| Nelson (2016)      | One           | Hip   | Controlled  | Steps              | Visual Observation / Count           | Time: Steps / 20 min     | Ambuation: Hallway or           | Ambulatory activities (4 x 5 min)                                     | 1.40%   |
| Nelson (2016)      | Zip           | Hip   | Controlled  | Steps              | Visual Observation / Count           | Time: Steps / 20 min     | Ambuation: Hallway or           | Ambulatory activities (4 x 5 min)                                     | 2.00%   |
| Nelson (2016)      | Flex          | Wrist | Controlled  | Steps              | Visual Observation / Count           | Time: Steps / 20 min     | Ambuation: Hallway or           | Ambulatory activities (4 x 5 min)                                     | -3.60%  |
| Nelson (2016)      | Zip           | hip   | Controlled  | Energy Expenditure | Indirect calorimetry (COSMED Srl):   | Total EE (kcal / 20min)  | ADLs                            | Household activities (standing, dusting, sweeping, vacuuming, folding | -34.17% |
| Nelson (2016)      | One           | hip   | Controlled  | Energy Expenditure | Indirect calorimetry (COSMED Srl):   | Total EE (kcal / 20min)  | ADLs                            | Household activities (standing, dusting, sweeping, vacuuming, folding | -26.64% |
| Nelson (2016)      | Flex          | wrist | Controlled  | Energy Expenditure | Indirect calorimetry (COSMED Srl):   | Total EE (kcal / 20min)  | ADLs                            | Household activities (standing, dusting, sweeping, vacuuming, folding | -7.25%  |

|                  |          |                 |            |                    |                                              |                          |                                 |                                                                              |         |
|------------------|----------|-----------------|------------|--------------------|----------------------------------------------|--------------------------|---------------------------------|------------------------------------------------------------------------------|---------|
| Nelson (2016)    | One      | hip             | Controlled | Energy Expenditure | Indirect calorimetry (COSMED Srl):           | Total EE (kcal / 20 min) | Ambulation: Hallway or          | Ambulatory activities x 4 slow overground walk, brisk overground walk,       | 15.95%  |
| Nelson (2016)    | Zip      | hip             | Controlled | Energy Expenditure | Indirect calorimetry (COSMED Srl):           | Total EE (kcal / 20 min) | Ambulation: Hallway or          | Ambulatory activities x 4 slow overground walk, brisk overground walk,       | 39.51%  |
| Nelson (2016)    | Flex     | wrist           | Controlled | Energy Expenditure | Indirect calorimetry (COSMED Srl):           | Total EE (kcal / 20 min) | Ambulation: Hallway or          | Ambulatory activities x 4 slow overground walk, brisk overground walk,       | 32.63%  |
| Nelson (2016)    | One      | hip             | Controlled | Energy Expenditure | Indirect calorimetry (COSMED Srl):           | Total EE (kcal / 15 min) | Resting                         | Sedentary activities x 3 (lying down, watching television, writing, reading, | -6.82%  |
| Nelson (2016)    | Zip      | hip             | Controlled | Energy Expenditure | Indirect calorimetry (COSMED Srl):           | Total EE (kcal / 15 min) | Resting                         | Sedentary activities x 3 (lying down, watching television, writing, reading, | -2.92%  |
| Nelson (2016)    | Flex     | wrist           | Controlled | Energy Expenditure | Indirect calorimetry (COSMED Srl):           | Total EE (kcal / 15 min) | Resting                         | Sedentary activities x 3 (lying down, watching television, writing, reading, | -6.82%  |
| O'Connell (2016) | One      | Chest           | Controlled | Steps              | Visual Observation / Count                   | Stair: Steps / 49 stairs | Stairs: Up                      | Stairs up (49 steps, self selected pace) step height 16cm                    | -0.90%  |
| O'Connell (2016) | One      | Chest           | Controlled | Steps              | Visual Observation / Count                   | Stair: Steps / 49 stairs | Stairs: Down                    | Stairs down (49 steps, self-selected pace) step height 16cm                  | 0.90%   |
| O'Connell (2016) | One      | Chest           | Controlled | Steps              | Visual Observation / Count                   | Distance: Steps / 880 m  | Walk: Asphalt                   | Tarmacadam/asphalt (880m) self selected pace                                 | -1.10%  |
| O'Connell (2016) | One      | Chest           | Controlled | Steps              | Visual Observation / Count                   | Distance: Steps / 900 m  | Walk: Grass                     | Natural lawn grass (900m) self selected pace                                 | -0.50%  |
| O'Connell (2016) | One      | Chest           | Controlled | Steps              | Visual Observation / Count                   | Distance: Steps / 990 m  | Walk: Gravel                    | gravel (990 m) self selected pace                                            | 0.08%   |
| O'Connell (2016) | One      | Chest           | Controlled | Steps              | Visual Observation / Count                   | Distance: Steps / 800 m  | Walk: Linoleum                  | Linoleum (800 m) self-selected pace                                          | 0.30%   |
| O'Connell (2016) | One      | Chest           | Controlled | Steps              | Visual Observation / Count                   | Distance: Steps / 500 m  | Walk: Ramp                      | Ramp (240 m up, 240 m down, incline of 4.05%) self-selected pace             | 0.50%   |
| O'Connell (2016) | One      | Chest           | Controlled | Steps              | Visual Observation / Count                   | Distance: Steps / 400 m  | Walk: Ceramic                   | Ceramic tile (400m) self selected pace                                       | 0.90%   |
| Park (2014)      | Ultra    | Hip             | Controlled | Steps              | Visual Observation / Count                   | Time: Steps / min        | Jog: Treadmil                   | 6 minutes, @ 161 m/min [2.7 m/s]                                             | -42.24% |
| Park (2014)      | Ultra    | Hip             | Controlled | Steps              | Visual Observation / Count                   | Time: Steps / min        | Jog: Treadmil                   | 6 minutes, @ 134 m/min [2.2 m/s]                                             | -30.81% |
| Park (2014)      | Ultra    | Waist           | Controlled | Steps              | Visual Observation / Count                   | Time: Steps / min        | Jog: Treadmil                   | 6 minutes, @ 161 m/min [2.7 m/s]                                             | -9.33%  |
| Park (2014)      | Ultra    | Upper Arm /     | Controlled | Steps              | Visual Observation / Count                   | Time: Steps / min        | Jog: Treadmil                   | 6 minutes, @ 161 m/min [2.7 m/s]                                             | -4.90%  |
| Park (2014)      | Ultra    | Waist           | Controlled | Steps              | Visual Observation / Count                   | Time: Steps / min        | Jog: Treadmil                   | 6 minutes, @ 134 m/min [2.2 m/s]                                             | -4.89%  |
| Park (2014)      | Ultra    | Chest / Lanyard | Controlled | Steps              | Visual Observation / Count                   | Time: Steps / min        | Jog: Treadmil                   | 6 minutes, @ 161 m/min [2.7 m/s]                                             | -3.85%  |
| Park (2014)      | Ultra    | Upper Arm /     | Controlled | Steps              | Visual Observation / Count                   | Time: Steps / min        | Jog: Treadmil                   | 6 minutes, @ 134 m/min [2.2 m/s]                                             | -3.73%  |
| Park (2014)      | Ultra    | Chest / Lanyard | Controlled | Steps              | Visual Observation / Count                   | Time: Steps / min        | Jog: Treadmil                   | 6 minutes, @ 134 m/min [2.2 m/s]                                             | -2.44%  |
| Park (2014)      | Ultra    | Hip Pocket      | Controlled | Steps              | Visual Observation / Count                   | Time: Steps / min        | Walk: Treadmil                  | 6 minutes, @ 107 m/min [1.8 m/s]                                             | -5.75%  |
| Park (2014)      | Ultra    | Chest / Lanyard | Controlled | Steps              | Visual Observation / Count                   | Time: Steps / min        | Walk: Treadmil                  | 6 minutes, @ 107 m/min [1.8 m/s]                                             | -2.91%  |
| Park (2014)      | Ultra    | Hip             | Controlled | Steps              | Visual Observation / Count                   | Time: Steps / min        | Walk: Treadmil                  | 6 minutes, @ 54 m/min [0.9 m/s]                                              | -1.57%  |
| Park (2014)      | Ultra    | Upper Arm /     | Controlled | Steps              | Visual Observation / Count                   | Time: Steps / min        | Walk: Treadmil                  | 6 minutes, @ 107 m/min [1.8 m/s]                                             | -0.82%  |
| Park (2014)      | Ultra    | Waist           | Controlled | Steps              | Visual Observation / Count                   | Time: Steps / min        | Walk: Treadmil                  | 6 minutes, @ 80 m/min [1.3 m/s]                                              | -0.69%  |
| Park (2014)      | Ultra    | Hip             | Controlled | Steps              | Visual Observation / Count                   | Time: Steps / min        | Walk: Treadmil                  | 6 minutes, @ 80 m/min [1.3 m/s]                                              | -0.52%  |
| Park (2014)      | Ultra    | Waist           | Controlled | Steps              | Visual Observation / Count                   | Time: Steps / min        | Walk: Treadmil                  | 6 minutes, @ 107 m/min [1.8 m/s]                                             | -0.15%  |
| Park (2014)      | Ultra    | Upper Arm /     | Controlled | Steps              | Visual Observation / Count                   | Time: Steps / min        | Walk: Treadmil                  | 6 minutes, @ 80 m/min [1.3 m/s]                                              | 0.00%   |
| Park (2014)      | Ultra    | Chest / Lanyard | Controlled | Steps              | Visual Observation / Count                   | Time: Steps / min        | Walk: Treadmil                  | 6 minutes, @ 54 m/min [0.9 m/s]                                              | -0.79%  |
| Park (2014)      | Ultra    | Chest / Lanyard | Controlled | Steps              | Visual Observation / Count                   | Time: Steps / min        | Walk: Treadmil                  | 6 minutes, @ 80 m/min [1.3 m/s]                                              | 0.26%   |
| Park (2014)      | Ultra    | Waist           | Controlled | Steps              | Visual Observation / Count                   | Time: Steps / min        | Walk: Treadmil                  | 6 minutes, @ 54 m/min [0.9 m/s]                                              | -0.29%  |
| Park (2014)      | Ultra    | Upper Arm /     | Controlled | Steps              | Visual Observation / Count                   | Time: Steps / min        | Walk: Treadmil                  | 6 minutes, @ 54 m/min [0.9 m/s]                                              | -0.20%  |
| Park (2014)      | Ultra    | Upper Arm /     | Controlled | Steps              | Visual Observation / Count                   | Time: Steps / min        | Walk: Outside                   | 9 minutes, @ self-selected speed                                             | -2.86%  |
| Park (2014)      | Ultra    | Hip             | Controlled | Steps              | Visual Observation / Count                   | Time: Steps / min        | Walk: Outside                   | 9 minutes, @ self-selected speed                                             | -2.45%  |
| Park (2014)      | Ultra    | Chest / Lanyard | Controlled | Steps              | Visual Observation / Count                   | Time: Steps / min        | Walk: Outside                   | 9 minutes, @ self-selected speed                                             | -2.18%  |
| Park (2014)      | Ultra    | Waist           | Controlled | Steps              | Visual Observation / Count                   | Time: Steps / min        | Walk: Outside                   | 9 minutes, @ self-selected speed                                             | -1.90%  |
| Park (2014)      | One, Zip | Hip             | Controlled | Steps              | Visual Observation / Count                   | Time: Steps / min        | Walk: Hallway                   | 2-minute WT (steps / 2-minutes)                                              | -0.53%  |
| Philips (2015)   | Classic  | Hip             | Controlled | Steps              | Visual Observation / Count                   | Distance: Steps / 100 ft | Walk: Hallway                   | 100 Feet, normal pace                                                        | -39.24% |
| Price (2016)     | One      | Waist           | Controlled | Energy Expenditure | Indirect calorimetry (TrueOne 2400 metabolic | EE (kcal/min)            | Treadmill                       | 0.7 m/s                                                                      | 33.84%  |
| Price (2016)     | One      | Waist           | Controlled | Energy Expenditure | Indirect calorimetry (TrueOne 2400 metabolic | EE (kcal/min)            | Treadmill                       | 1.25 m/s                                                                     | 53.29%  |
| Price (2016)     | One      | Waist           | Controlled | Energy Expenditure | Indirect calorimetry (TrueOne 2400 metabolic | EE (kcal/min)            | Treadmill                       | 1.80 m/s                                                                     | 46.23%  |
| Price (2016)     | One      | Waist           | Controlled | Energy Expenditure | Indirect calorimetry (TrueOne 2400 metabolic | EE (kcal/min)            | Treadmill                       | 2.22 m/s                                                                     | 48.71%  |
| Price (2016)     | One      | Waist           | Controlled | Energy Expenditure | Indirect calorimetry (TrueOne 2400 metabolic | EE (kcal/min)            | Treadmill                       | 2.78 m/s                                                                     | 29.98%  |
| Price (2016)     | One      | Waist           | Controlled | Energy Expenditure | Indirect calorimetry (TrueOne 2400 metabolic | EE (kcal/min)            | Treadmill                       | 3.33 m/s                                                                     | 14.41%  |
| Reid (2016)      | One      | Bra             | Freeliving | Steps              | Accelerometry (Actigraph GT3X)               | Steps / day              | Normal Daility Activities       | 7 days (waking hours)                                                        | 11.1%   |
| Reid (2016)      | One      | Waist           | Freeliving | Steps              | Accelerometry (Actigraph GT3X)               | Steps / day              | Normal Daility Activities       | 7 days (waking hours)                                                        | 11.1%   |
| Reid (2016)      | Flex     | Wrist           | Freeliving | Steps              | Accelerometry (Actigraph GT3X)               | Steps / day              | Normal Daility Activities       | 7 days (waking hours)                                                        | 6.4%    |
| Reid (2016)      | One      | Waist           | Freeliving | Time in Activity   | Accelerometry (Actigraph GT3X)               | Sedentary (Hours / day)  | 7 days (waking hours). FB Sleep | Sedentary 0-99 counts per minute                                             | -15.3%  |

|                  |         |       |            |                    |                                      |                          |                                    |                                                                            |         |
|------------------|---------|-------|------------|--------------------|--------------------------------------|--------------------------|------------------------------------|----------------------------------------------------------------------------|---------|
| Reid (2016)      | One     | Bra   | Freeliving | Time in Activity   | Accelerometry (Actigraph GT3X)       | Sedentary (Hours / day)  | 7 days (waking hours), FB Sleep    | Sedentary 0-99 counts per minute                                           | -13.3%  |
| Reid (2016)      | Flex    | Wrist | Freeliving | Time in Activity   | Accelerometry (Actigraph GT3X)       | Sedentary (Hours / day)  | 7 days (waking hours), FB Sleep    | Sedentary 0-99 counts per minute                                           | -11.7%  |
| Reid (2016)      | One     | Waist | Freeliving | Time in Activity   | Accelerometry (Actigraph GT3X)       | Light (Mins / Day)       | 7 days (waking hours)              | Light 100-2019 counts per min                                              | 54.6%   |
| Reid (2016)      | One     | Bra   | Freeliving | Time in Activity   | Accelerometry (Actigraph GT3X)       | Light (Mins / Day)       | 7 days (waking hours)              | Light 100-2019 counts per min                                              | 59.0%   |
| Reid (2016)      | Flex    | Wrist | Freeliving | Time in Activity   | Accelerometry (Actigraph GT3X)       | Light (Mins / Day)       | 7 days (waking hours)              | Light 100-2019 counts per min                                              | 4.6%    |
| Reid (2016)      | One     | Waist | Freeliving | Time in Activity   | Accelerometry (Actigraph GT3X)       | Moderate (Min / Day),    | 7 days (waking hours)              | Moderate 2020-5998 counts/min                                              | 42.1%   |
| Reid (2016)      | One     | Bra   | Freeliving | Time in Activity   | Accelerometry (Actigraph GT3X)       | Moderate (Min / Day),    | 7 days (waking hours)              | Moderate 2020-5998 counts/min                                              | 31.6%   |
| Reid (2016)      | Flex    | Wrist | Freeliving | Time in Activity   | Accelerometry (Actigraph GT3X)       | Moderate (Min / Day),    | 7 days (waking hours)              | Moderate 2020-5998 counts/min                                              | 47.4%   |
| Reid (2016)      | One     | Waist | Freeliving | Time in Activity   | Accelerometry (Actigraph GT3X)       | Vigorous (Min / Day),    | 7 days (waking hours)              | Vigorous > 5999 counts/min                                                 | 346.2%  |
| Reid (2016)      | One     | Bra   | Freeliving | Time in Activity   | Accelerometry (Actigraph GT3X)       | Vigorous (Min / Day),    | 7 days (waking hours)              | Vigorous > 5999 counts/min                                                 | 404.0%  |
| Reid (2016)      | Flex    | Wrist | Freeliving | Time in Activity   | Accelerometry (Actigraph GT3X)       | Vigorous (Min / Day),    | 7 days (waking hours)              | Vigorous > 5999 counts/min                                                 | 409.4%  |
| Sasaki (2015)    | Classic | Hip   | Controlled | Energy Expenditure | Indirect calorimetry (Oxycon Mobile) | Total EE (kcal / 6-min)  | ADL                                | Raking                                                                     | -28.95% |
| Sasaki (2015)    | Classic | Hip   | Controlled | Energy Expenditure | Indirect calorimetry (Oxycon Mobile) | Total EE (kcal / 6-min)  | ADL                                | Vacuuming                                                                  | -11.73% |
| Sasaki (2015)    | Classic | Hip   | Controlled | Energy Expenditure | Indirect calorimetry (Oxycon Mobile) | Total EE (kcal / 6-min)  | ADL                                | Laundry                                                                    | -34.21% |
| Sasaki (2015)    | Classic | Hip   | Controlled | Energy Expenditure | Indirect calorimetry (Oxycon Mobile) | Total EE (kcal / 6-min)  | ADL                                | Gardening                                                                  | -11.73% |
| Sasaki (2015)    | Classic | Hip   | Controlled | Energy Expenditure | Indirect calorimetry (Oxycon Mobile) | Total EE (kcal / 6-min)  | ADL                                | Office Work                                                                | -7.84%  |
| Sasaki (2015)    | Classic | Hip   | Controlled | Energy Expenditure | Indirect calorimetry (Oxycon Mobile) | Total EE (kcal / 6-min)  | ADL                                | Dusting                                                                    | 9.33%   |
| Sasaki (2015)    | Classic | Hip   | Controlled | Energy Expenditure | Indirect calorimetry (Oxycon Mobile) | Total EE (kcal / 6-min)  | Physical Activity: Stationary Bike | Cycling (300 kgm·min <sup>-1</sup> ) * pacing?                             | -67.56% |
| Sasaki (2015)    | Classic | Hip   | Controlled | Energy Expenditure | Indirect calorimetry (Oxycon Mobile) | Total EE (kcal / 6-min)  | Walk: Flat ground                  | Walking Carrying groceries - self selected speed                           | 43.93%  |
| Sasaki (2015)    | Classic | Hip   | Controlled | Energy Expenditure | Indirect calorimetry (Oxycon Mobile) | Total EE (kcal / 6-min)  | Sport                              | Tennis                                                                     | -19.59% |
| Sasaki (2015)    | Classic | Hip   | Controlled | Energy Expenditure | Indirect calorimetry (Oxycon Mobile) | Total EE (kcal / 6-min)  | Sport                              | Golf                                                                       | -3.76%  |
| Sasaki (2015)    | Classic | Hip   | Controlled | Energy Expenditure | Indirect calorimetry (Oxycon Mobile) | Total EE (kcal / 6-min)  | Sport                              | Basketball                                                                 | 15.91%  |
| Sasaki (2015)    | Classic | Hip   | Controlled | Energy Expenditure | Indirect calorimetry (Oxycon Mobile) | Total EE (kcal / 6-min)  | Stairs                             | Stairs - self selected speed                                               | -20.81% |
| Sasaki (2015)    | Classic | Hip   | Controlled | Energy Expenditure | Indirect calorimetry (Oxycon Mobile) | Total EE (kcal / 6-min)  | Walk Incline:Treadmill             | 4.0 mph, 5% incline [1.79 m/s]                                             | -19.00% |
| Sasaki (2015)    | Classic | Hip   | Controlled | Energy Expenditure | Indirect calorimetry (Oxycon Mobile) | Total EE (kcal / 6-min)  | Walk Incline:Treadmill             | 3.0 mph, 5% incline [1.34 m/s]                                             | -26.39% |
| Sasaki (2015)    | Classic | Hip   | Controlled | Energy Expenditure | Indirect calorimetry (Oxycon Mobile) | Total EE (kcal / 6-min)  | Jog:Treadmill                      | Jog 5.5 mph [2.46 m/s]                                                     | -2.74%  |
| Schaffer (2017)  | Zip     | Waist | Controlled | Steps              | Visual Observation / Count           | Time: steps/6 min        | Walking: Treadmill                 | 6 MWT, self-paced, 70 or 100 feet (all) n=24                               | -11.02% |
| Simpson (2015)   | One     | Ankle | Controlled | Steps              | Visual Observation / Count           | Distance: Steps / 15 m   | Walk: Hallway                      | 15 m walk, 0.8m/s                                                          | 0.00%   |
| Simpson (2015)   | One     | Ankle | Controlled | Steps              | Visual Observation / Count           | Distance: Steps / 15 m   | Walk: Hallway                      | 15 m walk, 0.9m/s                                                          | 3.57%   |
| Simpson (2015)   | One     | Hip   | Controlled | Steps              | Visual Observation / Count           | Distance: Steps / 15 m   | Walk: Hallway                      | 15 m walk, 0.8m/s                                                          | -6.67%  |
| Simpson (2015)   | One     | Hip   | Controlled | Steps              | Visual Observation / Count           | Distance: Steps / 15 m   | Walk: Hallway                      | 15 m walk, 0.9m/s                                                          | -3.57%  |
| Simpson (2015)   | One     | Ankle | Controlled | Steps              | Visual Observation / Count           | Distance: Steps / 15 m   | Walk: Hallway                      | 15 m walk, 0.3m/s                                                          | -12.24% |
| Simpson (2015)   | One     | Ankle | Controlled | Steps              | Visual Observation / Count           | Distance: Steps / 15 m   | Walk: Hallway                      | 15 m walk, 0.6m/s                                                          | -3.03%  |
| Simpson (2015)   | One     | Ankle | Controlled | Steps              | Visual Observation / Count           | Distance: Steps / 15 m   | Walk: Hallway                      | 15 m walk, 0.4m/s                                                          | 0.00%   |
| Simpson (2015)   | One     | Ankle | Controlled | Steps              | Visual Observation / Count           | Distance: Steps / 15 m   | Walk: Hallway                      | 15 m walk, 0.7m/s                                                          | 0.00%   |
| Simpson (2015)   | One     | Ankle | Controlled | Steps              | Visual Observation / Count           | Distance: Steps / 15 m   | Walk: Hallway                      | 15 m walk, 0.5m/s                                                          | 2.86%   |
| Simpson (2015)   | One     | Hip   | Controlled | Steps              | Visual Observation / Count           | Distance: Steps / 15 m   | Walk: Hallway                      | 15 m walk, 0.3m/s                                                          | -97.96% |
| Simpson (2015)   | One     | Hip   | Controlled | Steps              | Visual Observation / Count           | Distance: Steps / 15 m   | Walk: Hallway                      | 15 m walk, 0.4m/s                                                          | -82.93% |
| Simpson (2015)   | One     | Hip   | Controlled | Steps              | Visual Observation / Count           | Distance: Steps / 15 m   | Walk: Hallway                      | 15 m walk, 0.5m/s                                                          | -40.00% |
| Simpson (2015)   | One     | Hip   | Controlled | Steps              | Visual Observation / Count           | Distance: Steps / 15 m   | Walk: Hallway                      | 15 m walk, 0.6m/s                                                          | -21.21% |
| Simpson (2015)   | One     | Hip   | Controlled | Steps              | Visual Observation / Count           | Distance: Steps / 15 m   | Walk: Hallway                      | 15 m walk, 0.7m/s                                                          | -13.33% |
| Stackpool (2014) | Ultra   | Hip   | Controlled | Steps              | Visual Observation / Count           | Time: Steps / 20 min     | Physical Activity - Elliptical     | Elliptical, self selected intensity (~12-13 of 20 Borg scale)              | -0.04%  |
| Stackpool (2014) | Ultra   | Hip   | Controlled | Steps              | Visual Observation / Count           | Time: Steps / 20 min     | Run: Treadmill                     | Run self selected pace 20 minutes                                          | -6.03%  |
| Stackpool (2014) | Ultra   | Hip   | Controlled | Steps              | Visual Observation / Count           | Time: Steps / 20 min     | Walk: Treadmil                     | Walk self selected pace 20 minutes                                         | 0.00%   |
| Stackpool (2014) | Ultra   | Hip   | Controlled | Steps              | Visual Observation / Count           | Time: Steps / 20 min     | Physical Activity - Agility        | Sport Agility Activities (Ladder and Basketball) 20 minutes                | -19.88% |
| Stackpool (2014) | Ultra   | Hip   | Controlled | Energy Expenditure | Indirect calorimetry (Oxycon Mobile) | Total EE (kcal / 10-min) | Physical Activity: Elliptical      | Elliptical, self selected intensity (~12-13 of 20 Borg scale)              | -4.35%  |
| Stackpool (2014) | Ultra   | Hip   | Controlled | Energy Expenditure | Indirect calorimetry (Oxycon Mobile) | Total EE (kcal / 10-min) | Sport                              | Agility Activities (Ladder and Basketball)                                 | -16.67% |
| Stackpool (2014) | Ultra   | Hip   | Controlled | Energy Expenditure | Indirect calorimetry (Oxycon Mobile) | Total EE (kcal / 10-min) | Walk: Treadmill                    | walking, self selected pace                                                | 1.83%   |
| Stackpool (2014) | Ultra   | Hip   | Controlled | Energy Expenditure | Indirect calorimetry (Oxycon Mobile) | Total EE (kcal / 10-min) | Run: Treadmill                     | Run self selected pace                                                     | -4.17%  |
| Sushames (2016)  | Flex    | Wrist | Controlled | Steps              | Visual Observation / Count           | Time: Steps/ 6 min       | Incline Walking: Treadmill         | 5% incline, 1.39-1.8 m/s, self-paced (Borg's rate of perceived exhaustion) | -8.21%  |

|                     |           |       |            |                    |                                   |                          |                                |                                                                                |         |
|---------------------|-----------|-------|------------|--------------------|-----------------------------------|--------------------------|--------------------------------|--------------------------------------------------------------------------------|---------|
| Sushames (2016)     | Flex      | Wrist | Controlled | Steps              | Visual Observation / Count        | Time: Steps / 6 min      | Jog: Treadmill                 | 8-10 km/hr or 2.22-2.78 m/s, self-paced (Borg's rate of perceived              | 2.52%   |
| Sushames (2016)     | Flex      | Wrist | Controlled | Steps              | Visual Observation / Count        | Time: Steps / 6 min      | Walking: Treadmill             | 1.39-1.8 m/s, self-paced (Borg's rate of perceived exhaustion 4)               | -14.68% |
| Sushames (2016)     | Flex      | Wrist | Controlled | Steps              | Visual Observation / Count        | Time: Steps / 6 min      | Stair stepping                 | 15 cm box                                                                      | 1.07%   |
| Takacs (2014)       | One       | Hip   | Controlled | Steps              | Visual Observation / Count        | Time: Steps / 5 min      | Walk: Treadmill                | Walk 5 minutes 0.90 m/s                                                        | -0.25%  |
| Takacs (2014)       | One       | Hip   | Controlled | Steps              | Visual Observation / Count        | Time: Steps / 5 min      | Walk: Treadmill                | Walk 5 minutes 1.54 m/s                                                        | -0.18%  |
| Takacs (2014)       | One       | Hip   | Controlled | Steps              | Visual Observation / Count        | Time: Steps / 5 min      | Walk: Treadmill                | Walk 5 minutes 1.12 m/s                                                        | 0.00%   |
| Takacs (2014)       | One       | Hip   | Controlled | Steps              | Visual Observation / Count        | Time: Steps / 5 min      | Walk: Treadmill                | Walk 5 minutes 1.78 m/s                                                        | 0.00%   |
| Takacs (2014)       | One       | Hip   | Controlled | Steps              | Visual Observation / Count        | Time: Steps / 5 min      | Walk: Treadmill                | Walk 5 minutes 1.33 m/s                                                        | 0.19%   |
| Takacs (2014)       | One       | Hip   | Controlled | Distance           | Treadmill Distance                | Distance: km / 5 min     | Walk: Treadmill                | Walk 5 minutes 0.90 m/s                                                        | 40.0%   |
| Takacs (2014)       | One       | Hip   | Controlled | Distance           | Treadmill Distance                | Distance: km / 5 min     | Walk: Treadmill                | Walk 5 minutes 1.12 m/s                                                        | 26.9%   |
| Takacs (2014)       | One       | Hip   | Controlled | Distance           | Treadmill Distance                | Distance: km / 5 min     | Walk: Treadmill                | Walk 5 minutes 1.33 m/s                                                        | 15.2%   |
| Takacs (2014)       | One       | Hip   | Controlled | Distance           | Treadmill Distance                | Distance: km / 5 min     | Walk: Treadmill                | Walk 5 minutes 1.54 m/s                                                        | 2.5%    |
| Takacs (2014)       | One       | Hip   | Controlled | Distance           | Treadmill Distance                | Distance: km / 5 min     | Walk: Treadmill                | Walk 5 minutes 1.78 m/s                                                        | -4.3%   |
| Thorup (2017)       | Zip       | Waist | Freeliving | Steps              | Accelerometer [Shimmer 3 (ankle)] | Steps / day              | Normal Daility Activities      | 24 hours, waking hours (Hospital Ward)                                         | -43%    |
| Thorup (2017)       | Zip       | Waist | Freeliving | Steps              | Accelerometer [Shimmer 3 (ankle)] | Steps / day              | Normal Daility Activities      | 24 hours, waking hours                                                         | -25%    |
| Treacy (2017)       | One       | Ankle | Controlled | Steps              | Visual Observation / Count        | Time: Steps / 6 min      | Walking: Track (120 m)         | 6 MWT, self-paced, with or without walking aide                                | -16.00% |
| Treacy (2017)       | One       | Waist | Controlled | Steps              | Visual Observation / Count        | Time: Steps / 6 min      | Walking: Track (120 m)         | 6 MWT, self-paced, with or without walking aide                                | -48.00% |
| Treacy (2017)       | Charge    | Wrist | Controlled | Steps              | Visual Observation / Count        | Time: Steps / 6 min      | Walking: Track (120 m)         | 6 MWT, self-paced, with or without walking aide                                | -56.00% |
| van Blarigan (2017) | One       | Waist | Freeliving | Steps              | Accelerometry (Actigraph GT3X)    | Steps / day              | Normal Daility Activities      | 7 days, waking hours                                                           | 9%      |
| van Blarigan (2017) | One       | Waist | Freeliving | Steps              | Pedometry (Omron)                 | Steps / day              | Normal Daility Activities      | 7 days, waking hours                                                           | 36%     |
| van Blarigan (2017) | One       | Waist | Freeliving | Time in Activity   | Accelerometry (Actigraph GT3X)    | Light (Mins / Day)       | 8 days (waking hours)          | AG: 100-2019; FB < 3 METS (Light)                                              | 52%     |
| van Blarigan (2017) | One       | Waist | Freeliving | Time in Activity   | Accelerometry (Actigraph GT3X)    | Moderate (Min / Day),    | 9 days (waking hours)          | AG: 2020-5998; 3-5.9 METS (Farily Active)                                      | 72%     |
| van Blarigan (2017) | One       | Waist | Freeliving | Time in Activity   | Accelerometry (Actigraph GT3X)    | Vigorous (Min / Day)     | 10 days (waking hours)         | AG: > 5999; FB >= 6 METS (Very Active)                                         | 375%    |
| van Blarigan (2017) | One       | Waist | Freeliving | Time in Activity   | Accelerometry (Actigraph GT3X)    | MVPA (Mins / Day)        | 11 days (waking hours)         | AG: > = 2020, FB > = 3 METS                                                    | 96%     |
| Wallen (2016)       | Charge HR | Wrist | Controlled | Energy Expenditure | Indirect calorimetry (MetaMax 3B) | Total EE (Kcal / 58 min) | Physical Activity: Progressive | Sedentary (lying, sitting, standing) and physical Activity (walking, cycling). | -20.83% |
| Wong (2017)         | Ultra     | Waist | Controlled | Steps              | Visual Observation / Count        | Time: steps/1 min        | Walking: Treadmill             | steps/4 min, 0.9 m/s                                                           | -29.95% |
| Wong (2017)         | Ultra     | Waist | Controlled | Steps              | Visual Observation / Count        | Time: steps/1 min        | Walking: Treadmill             | steps/4 min, 1.1 m/s                                                           | -5.14%  |
| Wong (2017)         | Ultra     | Waist | Controlled | Steps              | Visual Observation / Count        | Time: steps/1 min        | Walking: Treadmill             | steps/4 min, 1.3 m/s                                                           | -5.88%  |
