# Supplementary material for: Accuracy of Fitbit Devices: Systematic Review and Narrative Syntheses of Quantitative Data
Source: PubMed Central journal article supplement (PMC6107736; doi:10.2196/10527), 2018-08-09
Supplement: mhealth_v6i8e10527_app5.pdf [file mhealth_v6i8e10527_app5.pdf]

Data Coding – Steps and Energy Expenditure in Controlled Settings.

| All comparisons in Steps and EE in controlled settings were coded for each of the following domains outlined below unless otherwise indicated as EE or Steps only |                               |                               |                                                                                                                              |                                             |
|-------------------------------------------------------------------------------------------------------------------------------------------------------------------|-------------------------------|-------------------------------|------------------------------------------------------------------------------------------------------------------------------|---------------------------------------------|
| Type of Test                                                                                                                                                      | Speed                         | Type of 'Ambulation'          | Limb (Body) Motion                                                                                                           | Body Position                               |
| Resting / Sitting [Si] – EE Only                                                                                                                                  | Jog ( $\geq 2$ m/s) [J]       | Continuous No Incline [Cn]    | Normal [Nr]                                                                                                                  | Torso [To]- Hip, chest, waist, or upper arm |
| Activity – EE Only                                                                                                                                                | Normal (1-2 m/s) [Nm]         | Intermittent [I] - No Incline | Constrained [C] (e.g. holding / pushing something, including walker, cane or constrained motion from disease such as stroke) | Wrist [Wr]                                  |
|                                                                                                                                                                   | Slow (0.8-0.9 m/s) [S]        | Continuous Incline [Ci]       | Exaggerated [Ex] (e.g. tennis, golf, carrying lap top bag)                                                                   | Ankle/Foot [AF] - Steps Only                |
|                                                                                                                                                                   | Very Slow (<0.8 m/s) [Vs]     |                               | Mixed [Mi] (e.g. ADL. Gym, Sport or variable activities)                                                                     |                                             |
|                                                                                                                                                                   | Self-Paced (Comfortable) [Sp] |                               |                                                                                                                              |                                             |
