# Supplementary material for: Accuracy of Fitbit Devices: Systematic Review and Narrative Syntheses of Quantitative Data
Source: PubMed Central journal article supplement (PMC6107736; doi:10.2196/10527), 2018-08-09
Supplement: mhealth_v6i8e10527_app6.pdf [file mhealth_v6i8e10527_app6.pdf]

| Included Studies - Study Characteristics |                |      |         |      |                        |            |                            |                 |                     |         |         |           |
|------------------------------------------|----------------|------|---------|------|------------------------|------------|----------------------------|-----------------|---------------------|---------|---------|-----------|
| First Author - Last Name                 | Pub Year (Mth) | Type | Country | Size | Age [Mean (SD)], Other | Gender     | Health / Mobility Status   | Fitbit Model(s) | Body Placement      | Setting | Outcome | Criterion |
| Adam Noah                                | 2014 (Oct)     | A    | USA     | 23   | 26.6 (7.55)            | F=10, M=13 | Healthy                    | Ultra, Classic  | Hip                 | L       | EE      | ID        |
| Alhrabi                                  | 2016 (Feb)     | A    | AUS     | 48   | 65.6 (6.9)             | F=23, M=25 | Cardiac, Bone-joint, Resp. | Flex            | Wrist               | F       | Steps   | Accel     |
|                                          |                |      |         |      |                        |            |                            |                 |                     |         | TiA     | Accel     |
| Alinia                                   | 2017 (Aug)     | A    | USA     | 15   | Range 21-31            | F=7, M=8,  | Healthy                    | Zip, One, Flex  | Chest, Waist, Wrist | L       | Steps   | VO        |
| An                                       | 2017 (Mar)     | A    | USA     | 35   | 31.0 (11.8)            | F=18, M=17 | Healthy                    | Flex, Zip       | Wrist, Waist        | F       | Steps   | Ped       |
|                                          |                |      |         |      |                        |            |                            |                 |                     | L       | Steps   | VO        |
| Bai                                      | 2016 (Jan)     | A    | USA     | 52   | Range 18-60            | F=24, M=28 | Healthy                    | Flex            | Wrist               | L       | EE      | ID        |
| Battenberg                               | 2017 (Jun)     | A    | USA     | 30   | 25.6 (2.5)             | F=12, M=18 | Healthy                    | One, Force      | Wrist, Waist        | L       | Steps   | VO        |
| Balto                                    | 2016 (Jan)     | A    | USA     | 45   | 46.7 (10.0)            | nr         | Multiple Sclerosis         | Flex, One       | Wrist, Waist        | L       | Steps   | VO        |
| Beevi                                    | 2015 (Oct)     | A    | DEN     | 14   | 29.9 (4.93)            | F=5, M=9   | Healthy                    | Zip             | Hip                 | L       | Steps   | VO        |
| Brewer                                   | 2017 (Sep)     | A    | USA     | 50   | 28.1 (9.12)            | F=41, M=9  | Healthy                    | Various         | Arm                 | F       | Steps   | Accel     |
|                                          |                |      |         |      |                        |            |                            |                 |                     |         | TiA     | Accel     |
| Brooke                                   | 2017 (Apr)     | A    | USA     | 95   | 28.5 (9.9)             | F=61, M=34 | Healthy                    | Charge HR, Flex | Wrist               | F       | EE      | Accel     |

|           |                |   |     |     |                |               |            |                            |                         |   |                           |       |
|-----------|----------------|---|-----|-----|----------------|---------------|------------|----------------------------|-------------------------|---|---------------------------|-------|
|           |                |   |     |     |                |               |            |                            |                         |   | Sleep                     | Accel |
| Chen      | 2016<br>(May)  | A | CHN | 30  | 21.5<br>(2.0)  | F=15,<br>M=15 | Healthy    | Flex                       | Wrist                   | L | Steps                     | VO    |
| Chowdhury | 2017<br>(Feb)  | A | UK  | 30  | 27 (6)         | F=15,<br>M=15 | Healthy    | Charge<br>HR               | Wrist                   | L | EE                        | ID    |
|           |                |   |     |     |                |               |            |                            |                         | F | EE                        | Accel |
| Chow      | 2017<br>(Sep)  | A | AUS | 31  | 24.3<br>(5.2)  | F=12,<br>M=19 | Healthy    | One, Flex,<br>Charge<br>HR | Waist,<br>Wrist         | L | Steps                     | VO    |
| Chu       | 2017<br>(Feb)  | A | USA | 104 | Med.<br>31.0   | F=69,<br>M=35 | Healthy    | Flex                       | Wrist                   | F | Steps                     | Accel |
| Cook      | 2017<br>(Aug)  | A | USA | 21  | 26.5<br>(4.6)  | F=17,<br>M=4  | Depression | Flex                       | Wrist                   | L | Sleep                     | PSG   |
| Dannecker | 2013<br>(Nov)  | A | USA | 19  | 26.9<br>(6.6)  | F=9,<br>M=10  | Healthy    | Classic                    | Hip                     | L | EE                        | DD    |
| Diaz      | 2016<br>(Apr)  | R | USA | 13  | 32.0<br>(9.2)  | F=13,<br>M=0  | Healthy    | One, Flex,<br>Charge<br>HR | Torso,<br>Hip,<br>Wrist | L | Steps                     | VO    |
|           |                |   |     |     |                |               |            |                            |                         |   | EE                        | ID    |
| Dickinson | 2017<br>(Nov)  | A | USA | 38  | 26.05<br>(8.0) | F=23,<br>M=15 | Healthy    | Charge<br>HR               | Wrist                   | F | Sleep                     | Accel |
| Dominick  | 2016<br>(Sept) | A | USA | 19  | 20.6 (nr)      | F=15,<br>M=4  | Healthy    | Flex                       | Wrist                   | F | Steps                     | Accel |
| Doolley   | 2017<br>(Mar)  | A | USA | 62  | 22.6<br>(4.3)  | F=36,<br>M=26 | Healthy    | Charge<br>HR               | Wrist                   | L | Energy<br>Expendit<br>ure | ID    |
| Dondzila  | 2016<br>(Jun)  | A | USA | 19  | 24.6<br>(3.1)  | F=5,<br>M=14  | Healthy    | Charge<br>HR               | Wrist                   | L | EE                        | ID    |
| Farina    | 2017<br>(Nov)  | A | UK  | 25  | 72.5<br>(4.9)  | F=13,<br>M=12 | Healthy    | Charge<br>HR               | Wrist                   | F | Steps                     | Accel |
| Ferguson  | 2015<br>(Mar)  | A | AUS | 21  | 32.8<br>(10.2) | F=11,<br>M=10 | Healthy    | One, Zip                   | Hip                     | F | Sleep                     | Accel |

|           |             |   |     |    |             |               |                   |                      |                     |   |       |       |
|-----------|-------------|---|-----|----|-------------|---------------|-------------------|----------------------|---------------------|---|-------|-------|
|           |             |   |     |    |             |               |                   |                      |                     |   | EE    | Accel |
|           |             |   |     |    |             |               |                   |                      |                     |   | Steps | Accel |
|           |             |   |     |    |             |               |                   |                      |                     |   | TiA   | Accel |
| Floegel   | 2016 (June) | A | USA | 99 | 78.9 (8.6)  | F = 71, M= 29 | Variable Mobility | One, Flex, Charge HR | Hip, Wrist          | L | Steps | VO    |
| Fokkema   | 2016 (Nov)  | A | NED | 31 | 32 (12)     | F=15, M=16    | Healthy           | Charge HR            | Wrist               | L | Steps | VO    |
| Fulk      | 2014 (Feb)  | A | USA | 50 | 52.9 (15.1) | F=16, M=34    | Post-stroke       | Ultra                | Hip                 | L | Steps | VO    |
| Gomersall | 2016 (Sept) | A | AUS | 29 | 39.6 (11.0) | F=26, M=3     | Healthy           | One                  | Waist               | F | Steps | Accel |
|           |             |   |     |    |             |               |                   |                      |                     |   | TiA   | Accel |
| Gusmer    | 2014 (Apr)  | A | USA | 32 | 21.2 (1.7)  | F=25, M=7     | Healthy           | Ultra                | Hip                 | L | EE    | ID    |
| Hargens   | 2017 (Jan)  | A | USA | 22 | 30.8 (11.4) | F=15, M=7     | Healthy           | Charge, One          | Wrist, Waist        | F | Steps | Accel |
|           |             |   |     |    |             |               |                   |                      |                     |   | EE    | Accel |
|           |             |   |     |    |             |               |                   |                      |                     |   | TiA   | Accel |
| Hui       | 2017 (Oct)  | A | CAN | 12 | 62.6 (9.3)  | F=5, M=7      | Post-stroke       | One                  | Ankle (non-paretic) | F | Steps | Accel |
|           |             |   |     |    |             |               |                   |                      |                     |   | TiA   | Accel |
| Husted    | 2017 (Jan)  | A | USA | 12 | 20.8 (0.94) | F=11, M=1     | Healthy           | Charge               | Wrist               | L | Steps | VO    |
| Huang     | 2016 (Aprl) | A | CHN | 40 | 23.9 (2.8)  | F=10, M=30    | Healthy           | Zip, One, Flex       | Wrist, Waist        | L | Steps | VO    |

|            |                |   |     |    |                 |               |                                 |                   |                                    |   | Dist  | Meas  |
|------------|----------------|---|-----|----|-----------------|---------------|---------------------------------|-------------------|------------------------------------|---|-------|-------|
| Imboden    | 2017<br>(Apr)  | A | USA | 30 | 49.2<br>(19.2)  | F=15,<br>M=15 | Healthy                         | One, Zip,<br>Flex | Waist,<br>Wrist                    | L | Steps | VO    |
|            |                |   |     |    |                 |               |                                 |                   |                                    |   | TiA   | Accel |
|            |                |   |     |    |                 |               |                                 |                   |                                    |   | EE    | ID    |
| Klassen    | 2015<br>(Oct)  | A | CAN | 43 | 65<br>(10.66)   | F=13,<br>M=30 | Post-stroke                     | One               | Hip,<br>Ankle<br>(non-<br>paretic) | L | Steps | VO    |
| Kooiman    | 2015<br>(Oct)  | A | NED | 33 | 35.3 (nr)       | F=17,<br>M=16 | Healthy                         | Flex, Zip         | Wrist, Hip                         | L | Steps | VO    |
|            |                |   |     |    |                 |               |                                 |                   |                                    | F | Steps | Accel |
| Lee        | 2014<br>(Sept) | A | USA | 60 | 26.4 (nr)       | F=30,<br>M=30 | Healthy                         | One, Zip          | Hip                                | L | EE    | IID   |
| Lee        | 2017<br>(Oct)  | A | KOR | 16 | 22.8<br>(2.8)   | F=10,<br>M=6  | Healthy                         | Charge<br>HR      | Wrist                              | F | Sleep | Accel |
| Madigan    | 2017<br>(Jan)  | A | USA | 30 | 80.6<br>(7.66)  | F=18,<br>M=12 | Chronic<br>Health<br>Conditions | Flex              | Wrist                              | L | Steps | VO    |
| Mantua     | 2016<br>(May)  | A | USA | 40 | 22.37<br>(4.92) | F=19,<br>M=21 | Healthy                         | Flex              | Wrist                              | L | Sleep | PSG   |
| Middlewerd | 2017<br>(Jun)  | R | NED | 34 | 23.9<br>(3.9)   | F=23,<br>M=11 | Healthy                         | One               | Hip                                | F | Steps | Accel |
|            |                |   |     |    |                 |               |                                 |                   |                                    |   | TiA   | Accel |
| Modave     | 2017<br>(Jun)  | A | USA | 60 | 49.5<br>(19.4)  | F=36,<br>M=24 | Healthy                         | Surge             | Wrist                              | L | Steps | VO    |
| Montes     | 2017<br>(Oct)  | R | USA | 49 | 23.4<br>(6.6)   | F=23,<br>M=26 | Healthy                         | Flex              | Wrist                              | L | EE    | ID    |
|            |                |   |     |    |                 |               |                                 |                   |                                    |   | Steps | VO    |

|             |            |             |     |    |              |            |         |                |                    |   |       |         |
|-------------|------------|-------------|-----|----|--------------|------------|---------|----------------|--------------------|---|-------|---------|
| Montoye     | 2017 (Oct) | A           | USA | 32 | 23.5 (1.3)   | F=14,M=18  | Healthy | Charge HR      | Wrist              | L | EE    | ID      |
| Montgomery  | 2012 (Sep) | A           | USA | 24 | 26.1 (nr)    | F=10, M=14 | Healthy | Classic        | Wrist              | L | Sleep | PSG     |
| Murakami    | 2016 (May) | L to Editor | JAP | 19 | Range 21-50  | F=10, M=9  | Healthy | Flex           | Wrist              | L | EE    | DD      |
|             |            |             |     |    |              |            |         |                |                    | F | EE    | DLW     |
| Nelson      | 2016 (Mar) | A           | USA | 30 | 48.9 (19.4)  | F=15, M=15 | Healthy | One, Zip, Flex | Hip, Wrist         | L | Steps | VO      |
|             |            |             |     |    |              |            |         |                |                    |   | EE    | ID      |
| O'Connell   | 2016 (May) | A           | IRE | 15 | 21.1 (1.1)   | F=8, M=7   | Healthy | One            | Chest              | L | Steps | VO      |
| Park        | 2014 (May) | A           | USA | 40 | 38.6 (nr)    | F=20, M=20 | Healthy | Ultra          | Chest, Hip, Wrist  | L | Steps | VO      |
| Paul        | 2015 (Jul) | A           | AUS | 32 | 67.7 (5.7)   | F=20, M=12 | Healthy | One, Zip       | Hip                | F | Steps | Accel   |
|             |            |             |     |    |              |            |         |                |                    | L | Steps | VO      |
| Phillips    | 2015 (Sep) | R           | USA | 50 | 84.2 (7.1)   | F=45, M=5  | Healthy | Classic        | Hip                | L | Steps | VO      |
| Price       | 2016 (Dec) | A           | AUS | 14 | 23.0 (6.0)   | F=3, M=11  | Healthy | One            | Waist or Bra       | L | EE    | VO      |
| Reid        | 2016 (Nov) | A           | CAD | 22 | 21.23 (1.63) | F=22 M=0   | Healthy | Flex, One      | Wrist, Waist / Bra | F | Steps | Accel   |
|             |            |             |     |    |              |            |         |                |                    |   | Time  | Accel   |
| Rosenberger | 2016 (Mar) | A           | USA | 40 | 36, (nr)     | F=21, M=19 | Healthy | One            | Hip, Wrist         | F | Steps | Ped     |
|             |            |             |     |    |              |            |         |                |                    |   | TiA   | Accel   |
|             |            |             |     |    |              |            |         |                |                    |   | Sleep | Monitor |

|              |             |   |     |     |                |            |                             |             |                   |   |       |       |
|--------------|-------------|---|-----|-----|----------------|------------|-----------------------------|-------------|-------------------|---|-------|-------|
| Sasaki       | 2015 (Feb)  | A | USA | 20  | 24.1 (4.5)     | F=10, M=10 | Healthy                     | Classic     | Hip               | L | EE    | ID    |
| Schaffer     | 2017 (Oct)  | A | USA | 24  | 54 (13.4)      | F=10, M=14 | Post-stroke                 | Zip         | Waist             | L | Steps | VO    |
| Scherbina    | 2017 (May)  | A | USA | 60  | 38.5 (nr)      | F=31, M=29 | Healthy                     | Surge       | Wrist             | L | EE    | ID    |
| Simpson      | 2015 (Oct)  | A | CAN | 42  | 73 (6.9)       | F=31, M=11 | Healthy                     | One         | Hip, Ankle        | L | Steps | VO    |
| Stackpool    | 2014 (Dec)  | A | USA | 20  | 22 (nr)        | F=10, M=10 | Healthy                     | Ultra       | NR                | L | Steps | VO    |
|              |             |   |     |     |                |            |                             |             |                   |   | EE    | ID    |
| Sushames     | 2016 (Sept) | A | AUS | 25  | 23.7 (5.8)     | F=12, M=13 | Healthy                     | Flex        | Wrist             | L | Steps | VO    |
| Takacs       | 2014 (Sep)  | A | CAN | 30  | 29.6 (5.7)     | F=15, M=15 | Healthy                     | One         | Hip               | L | Steps | VO    |
|              |             |   |     |     |                |            |                             |             |                   |   | Dist. | Meas  |
| Thorup       | 2017 (Mar)  | A | DEN | 44  | 53 (nr),       | F=12, M=32 | Healthy and Cardiac Disease | Zip         | Hip, Chest        | F | Steps | Ped   |
| Treacy       | 2017 (May)  | A | AUS | 166 | 80 (11), 26-98 | F=75, M=91 | Inpatient Rehab Patients    | One, Charge | Hip, Wrist, Ankle | L | Steps | VO    |
| Tully        | 2014 (Dec)  | R | UK  | 42  | Med. 43        | F=25, M=17 | Healthy                     | Zip         | Hip               | F | EE    | Accel |
|              |             |   |     |     |                |            |                             |             |                   |   | Steps | Ped   |
| Van Blarigan | 2017 (Jan)  | A | USA | 22  | Med. 66        | F=0, M=22  | Prostate Cancer Survivor    | One         | Waist             | F | TiA   | Accel |
|              |             |   |     |     |                |            |                             |             |                   |   | Steps | Accel |
| Wahl         | 2017 (Sep)  | A | GER | 20  | 25.2 (nr)      | F=10, M=10 | Healthy                     |             | Wrist             | L | Steps | VO    |

|                                                                                                                                                                                                      |               |   |     |    |                |               |         | Charge,<br>Charge<br>HR |       |   | Dist. | Meas |
|------------------------------------------------------------------------------------------------------------------------------------------------------------------------------------------------------|---------------|---|-----|----|----------------|---------------|---------|-------------------------|-------|---|-------|------|
|                                                                                                                                                                                                      |               |   |     |    |                |               |         |                         |       |   | EE    | ID   |
| Wallen                                                                                                                                                                                               | 2016<br>(May) | A | AUS | 22 | 24.9<br>(5.6)  | F=11,<br>M=11 | Healthy | Charge<br>HR            | Wrist | L | EE    | ID   |
|                                                                                                                                                                                                      |               |   |     |    |                |               |         |                         |       |   | Steps | VO   |
| Wong                                                                                                                                                                                                 | 2017<br>(Oct) | A | USA | 25 | 25.96<br>(7.9) | F=12,<br>M=13 | Healthy | Ultra                   | Waist | L | Steps | VO   |
| Type: (A)rticle, Short (R)eport, (L)etter to Editor                                                                                                                                                  |               |   |     |    |                |               |         |                         |       |   |       |      |
| Setting: (L)aboratory, (F)ree-Living                                                                                                                                                                 |               |   |     |    |                |               |         |                         |       |   |       |      |
| Outcome: EE – Energy Expenditure, TiA – Time in Activity, Dist - Distance                                                                                                                            |               |   |     |    |                |               |         |                         |       |   |       |      |
| Criterion: Accel – Accelerometer, Ped – Pedometer, ID – Indirect Calorimetry, DD – Direct Calorimetry, VO – Visual Observation, Meas – Measured, PSG – Polysomnography, DLW – Doubly Labelled Water. |               |   |     |    |                |               |         |                         |       |   |       |      |
