# Supplementary material for: Accuracy of Fitbit Devices: Systematic Review and Narrative Syntheses of Quantitative Data
Source: PubMed Central journal article supplement (PMC6107736; doi:10.2196/10527), 2018-08-09
Supplement: mhealth_v6i8e10527_app7.pdf [file mhealth_v6i8e10527_app7.pdf]

| Accuracy Evaluations Reported and Risk of Bias Assessment |         |         |                                  |                                      |     |                                             |                       |             |                      |              |                     |
|-----------------------------------------------------------|---------|---------|----------------------------------|--------------------------------------|-----|---------------------------------------------|-----------------------|-------------|----------------------|--------------|---------------------|
| Study Information                                         |         |         | Accuracy Evaluation(s) Reported  |                                      |     | <sup>b</sup> COSMIN Risk of Bias Assessment |                       |             |                      |              |                     |
| First Author - Last Name                                  | Setting | Outcome | <sup>a</sup> Mean / % Difference | Mean / Median Absolute Percent Error | LOA | Missing Data Report                         | Missing Data Handling | Sample Size | Acceptable Criterion | Design Flaws | Acceptable Accuracy |
| Adam Noah                                                 | C       | EE      | Y                                | N                                    | N   | G                                           | F                     | P           | E                    | E            | G                   |
| Alhrabi                                                   | F       | Steps   | Y                                | N                                    | Y   | E                                           | E                     | F           | E                    | E            | E                   |
|                                                           | F       | TiA     | Y                                | N                                    | N   | E                                           | E                     | F           | E                    | E            | G                   |
| Bai                                                       | C       | EE      | Y                                | Y                                    | Y   | E                                           | G                     | G           | E                    | F            | E                   |
| Balto                                                     | C       | Steps   | Y                                | N                                    | N   | G                                           | F                     | F           | E                    | E            | E                   |
| Battenberg                                                | C       | Steps   | Y                                | N                                    | N   | G                                           | F                     | F           | E                    | E            | G                   |
| Beevi                                                     | C       | Steps   | Y                                | N                                    | N   | G                                           | F                     | P           | E                    | E            | E                   |
| Brewer                                                    | F       | Steps   | Y                                | N                                    | Y   | E                                           | E                     | G           | E                    | E            | E                   |
|                                                           | F       | TiA     | Y                                | N                                    | Y   | E                                           | E                     | G           | E                    | E            | E                   |
| Brooke                                                    | F       | EE      | Y                                | Y                                    | Y   | E                                           | E                     | P           | E                    | E            | E                   |
|                                                           | F       | Sleep   | Y                                | Y                                    | Y   | E                                           | E                     | P           | E                    | E            | E                   |
| Chen                                                      | C       | Steps   | Y                                | Y                                    | Y   | G                                           | F                     | F           | E                    | E            | E                   |
| Chow                                                      | C       | Steps   | Y                                | N                                    | N   | G                                           | F                     | F           | E                    | E            | G                   |
| Chowdhury                                                 | C       | EE      | Y                                | Y                                    | Y   | G                                           | F                     | F           | E                    | E            | E                   |
| Cook                                                      | C       | Sleep   | Y                                | N                                    | Y   | G                                           | F                     | P           | E                    | E            | E                   |
| Dannecker                                                 | C       | EE      | Y                                | N                                    | N   | E                                           | E                     | P           | E                    | F            | E                   |
| Diaz                                                      | C       | Steps   | Y                                | N                                    | Y   | G                                           | F                     | P           | E                    | E            | E                   |
|                                                           | C       | EE      | Y                                | N                                    | Y   | G                                           | F                     | P           | E                    | E            | E                   |
| Dominick                                                  | F       | Steps   | Y                                | N                                    | N   | E                                           | E                     | P           | E                    | E            | G                   |
| Dondzila                                                  | C       | EE      | Y                                | Y                                    | N   | G                                           | F                     | P           | E                    | E            | E                   |
| Doolley                                                   | C       | EE      | Y                                | Y                                    | N   | G                                           | F                     | G           | E                    | E            | E                   |
| Farina                                                    | F       | Steps   | Y                                | N                                    | Y   | E                                           | E                     | P           | E                    | E            | E                   |
| Ferguson                                                  | F       | Sleep   | Y                                | Y                                    | Y   | E                                           | E                     | P           | E                    | E            | E                   |
|                                                           | F       | EE      | Y                                | Y                                    | Y   | E                                           | E                     | P           | G                    | E            | E                   |
|                                                           | F       | Steps   | Y                                | Y                                    | Y   | E                                           | E                     | P           | E                    | E            | E                   |
|                                                           | F       | TiA     | Y                                | Y                                    | Y   | E                                           | E                     | P           | E                    | E            | E                   |
| Floegel                                                   | C       | Steps   | Y                                | Y                                    | Y   | E                                           | E                     | G           | E                    | E            | E                   |
| Fokkema                                                   | C       | Steps   | Y                                | Y                                    | Y   | E                                           | E                     | F           | E                    | E            | E                   |
| Fulk                                                      | C       | Steps   | Y                                | N                                    | Y   | E                                           | E                     | G           | E                    | E            | E                   |
| Gomersall                                                 | F       | Steps   | Y                                | N                                    | Y   | E                                           | E                     | P           | E                    | E            | E                   |
|                                                           | F       | TiA     | Y                                | N                                    | Y   | E                                           | E                     | P           | E                    | E            | E                   |
| Gusmer                                                    | C       | EE      | Y                                | N                                    | Y   | G                                           | F                     | F           | E                    | E            | E                   |
| Hargens                                                   | F       | Steps   | Y                                | Y                                    | Y   | G                                           | G                     | P           | E                    | E            | E                   |
| Huang                                                     | C       | Steps   | Y                                | N                                    | N   | G                                           | F                     | F           | E                    | E            | G                   |
|                                                           | C       | Dist.   | Y                                | N                                    | N   | G                                           | F                     | F           | E                    | E            | G                   |

|              |   |       |   |   |   |   |   |   |   |   |   |
|--------------|---|-------|---|---|---|---|---|---|---|---|---|
| Hui          | F | Steps | Y | N | N | G | F | P | E | E | G |
|              | F | TiA   | Y | N | N | G | F | P | E | E | G |
| Imboden      | C | Steps | Y | Y | Y | G | G | F | E | F | E |
|              | C | TiA   | Y | Y | Y | G | G | F | E | F | E |
|              | C | EE    | Y | Y | Y | G | G | F | E | F | E |
| Klassen      | C | Steps | Y | N | N | E | E | F | E | E | E |
| Kooiman      | C | Steps | Y | Y | Y | G | F | F | E | E | E |
|              | F | Steps | Y | Y | Y | G | F | F | E | E | E |
| Lee (2014)   | C | EE    | Y | Y | Y | E | E | G | E | E | E |
| Lee (2017)   | F | Sleep | Y | N | N | E | E | P | E | E | G |
| Mantua       | C | Sleep | Y | Y | Y | E | E | F | E | E | E |
| Middlewerd   | F | Steps | Y | N | Y | E | E | F | E | E | E |
|              | F | TiA   | Y | N | Y | E | E | F | E | E | E |
| Modave       | C | Steps | Y | N | N | G | G | G | E | E | G |
| Montes       | C | EE    | Y | N | N | G | F | F | E | E | E |
|              | C | Steps | Y | N | N | G | F | F | E | E | E |
| Montgomery   | C | Sleep | Y | N | Y | G | F | P | E | E | E |
| Montoye      | C | EE    | Y | Y | Y | E | E | F | E | E | E |
| Murakami     | C | EE    | Y | N | N | G | F | P | E | E | G |
|              | F | EE    | Y | N | N | G | F | P | E | E | G |
| Nelson       | C | Steps | Y | Y | N | E | E | F | E | F | E |
|              | C | EE    | Y | Y | N | E | E | F | E | F | E |
| O'Connell    | C | Steps | Y | Y | Y | G | F | P | E | E | E |
| Park         | C | Steps | Y | N | N | G | F | F | E | E | E |
| Paul         | C | Steps | Y | N | Y | G | F | F | E | E | E |
| Phillips     | C | Steps | Y | N | Y | E | E | G | E | E | E |
| Price        | C | EE    | Y | N | Y | G | F | P | E | E | E |
| Reid         | F | Steps | Y | N | Y | E | E | P | E | E | G |
|              | F | TiA   | Y | N | Y | E | E | P | E | E | G |
| Sasaki       | C | EE    | Y | N | Y | G | F | P | E | F | E |
| Schaffer     | C | Steps | Y | Y | Y | E | E | P | E | E | E |
| Simpson      | C | Steps | Y | N | Y | G | F | F | E | E | E |
| Stackpool    | C | Steps | Y | N | N | G | F | P | E | E | G |
|              | C | EE    | Y | N | N | G | F | P | E | E | G |
| Sushames     | C | Steps | Y | N | Y | E | E | P | E | E | E |
| Takacs       | C | Steps | Y | N | Y | G | F | F | E | E | E |
|              | C | Dist. | Y | N | Y | G | F | F | E | F | E |
| Thorup       | F | Steps | Y | N | Y | G | F | P | E | E | E |
| Treacy       | C | Steps | Y | N | N | E | E | E | E | E | G |
| Van Blarigan | F | TiA   | Y | N | N | E | E | P | E | E | G |
|              | F | Steps | Y | N | N | E | E | P | E | E | G |
| Wallen       | C | EE    | Y | N | Y | E | E | P | E | E | E |
| Wong         | C | Steps | Y | N | N | E | E | P | E | E | G |

| Supplementary Accuracy Studies (Or Outcomes) Excluded from Quantitative Analyses                                                                   |   |       |   |   |   |                       |      |     |     |      |     |     |
|----------------------------------------------------------------------------------------------------------------------------------------------------|---|-------|---|---|---|-----------------------|------|-----|-----|------|-----|-----|
| Alinia                                                                                                                                             | C | Steps | N | Y | N | G                     | F    | P   | E   | E    | P   |     |
| An                                                                                                                                                 | F | Steps | N | Y | Y | G                     | F    | F   | E   | E    | P   |     |
|                                                                                                                                                    | C | Steps | N | Y | Y | G                     | F    | F   | E   | E    | P   |     |
| Chowdhury                                                                                                                                          | F | EE    | N | Y | Y | G                     | F    | F   | E   | E    | P   |     |
| Chu                                                                                                                                                | F | Steps | N | Y | Y | E                     | E    | E   | E   | E    | P   |     |
| Dickinson                                                                                                                                          | F | Sleep | N | N | Y | E                     | E    | F   | E   | E    | P   |     |
| Hargens                                                                                                                                            | F | EE    | N | Y | Y | G                     | G    | P   | G   | E    | P   |     |
|                                                                                                                                                    | F | TiA   | N | Y | Y | G                     | G    | P   | E   | E    | P   |     |
| Husted                                                                                                                                             | C | Steps | N | N | Y | G                     | F    | P   | E   | E    | P   |     |
| Madigan                                                                                                                                            | C | Steps | N | N | Y | E                     | E    | F   | E   | E    | P   |     |
| Paul                                                                                                                                               | F | Steps | N | N | Y | G                     | F    | F   | E   | E    | P   |     |
| Rosenberger                                                                                                                                        | F | Steps | N | Y | Y | G                     | F    | F   | E   | E    | P   |     |
|                                                                                                                                                    | F | TiA   | N | Y | Y | G                     | F    | F   | E   | E    | P   |     |
|                                                                                                                                                    | F | Sleep | N | Y | Y | G                     | F    | F   | E   | E    | P   |     |
| Scherbina                                                                                                                                          | C | EE    | N | Y | N | G                     | G    | G   | E   | E    | P   |     |
| Tully                                                                                                                                              | F | EE    | N | N | Y | E                     | E    | F   | G   | E    | P   |     |
|                                                                                                                                                    | F | Steps | N | N | Y | E                     | E    | F   | E   | E    | P   |     |
| Wahl                                                                                                                                               | C | Steps | N | Y | Y | G                     | F    | P   | E   | E    | P   |     |
|                                                                                                                                                    | C | Dist. | N | Y | Y | G                     | F    | P   | E   | E    | P   |     |
|                                                                                                                                                    | C | EE    | N | Y | Y | G                     | F    | P   | E   | E    | P   |     |
| Wallen                                                                                                                                             | C | Steps | N | N | Y | E                     | E    | P   | E   | E    | P   |     |
| Risk of Bias Summary                                                                                                                               |   |       |   |   |   | Excellent (n)         | 44   | 43  | 2   | 96   | 90  | 57  |
|                                                                                                                                                    |   |       |   |   |   | Good (n)              | 55   | 9   | 10  | 3    | 0   | 21  |
|                                                                                                                                                    |   |       |   |   |   | Excellent or Good (%) | 100% | 53% | 12% | 100% | 91% | 79% |
|                                                                                                                                                    |   |       |   |   |   | Fair (n)              | 0    | 43  | 39  | 0    | 9   | 0   |
|                                                                                                                                                    |   |       |   |   |   | Poor (n)              | 0    | 0   | 46  | 0    | 0   | 21  |
|                                                                                                                                                    |   |       |   |   |   | Fair or Poor (%)      | 0%   | 43% | 86% | 0%   | 9%  | 21% |
| <sup>a</sup> Group Mean or Percent Difference Reported = Yes (Included in Quantitative Analyses) N (Not included in Quantitative Analyses)         |   |       |   |   |   |                       |      |     |     |      |     |     |
| <sup>b</sup> COSMIN: COnsensus-based Standards for the selection of health status Measurement Instruments [16,17]                                  |   |       |   |   |   |                       |      |     |     |      |     |     |
| C=Controlled, F=Free-Living, Dist. = Distance. TiA = Time in Activity. Y=Yes, N=No, E= Excellent, G=Good, F=Fair, P=Poor, LOA = Level of Agreement |   |       |   |   |   |                       |      |     |     |      |     |     |
