# Supplementary material for: Accuracy of Fitbit Devices: Systematic Review and Narrative Syntheses of Quantitative Data
Source: PubMed Central journal article supplement (PMC6107736; doi:10.2196/10527), 2018-08-09
Supplement: mhealth_v6i8e10527_app8.pdf [file mhealth_v6i8e10527_app8.pdf]

| Controlled Settings: Accuracy – Measurement Error (%). |                          |     |                                                    |                       |                         |                                         |        |                                    |         |
|--------------------------------------------------------|--------------------------|-----|----------------------------------------------------|-----------------------|-------------------------|-----------------------------------------|--------|------------------------------------|---------|
| Outcome                                                | Sub-Categories           | #   | Measurement Error (%) - Within / Outside $\pm 3\%$ |                       |                         | Measurement Error (%) - Point Estimates |        | Measurement Error (%) – Dispersion |         |
|                                                        |                          |     | Within $\pm 3\%$ [# (%)]                           | Less than -3% [# (%)] | Greater than 3% [# (%)] | Mean                                    | Median | Minimum                            | Maximum |
| Steps - All Comparisons                                |                          | 191 | 88 (46%)                                           | 97 (51%)              | 6 (3%)                  | -9.3%                                   | -3.3%  | -98.0%                             | 11%     |
| Steps - Speed of Ambulation                            | Jog (> 2.0 m/s)          | 24  | 14 (58%)                                           | 10 (42%)              | 0                       | -4.7%                                   | -1.8%  | -42.2%                             | 2.7%    |
|                                                        | Normal (1.0-2.0 m/s)     | 48  | 25 (52%)                                           | 22 (46%)              | 1 (2%)                  | -3.5%                                   | -2.4%  | -14.7%                             | 6.5%    |
|                                                        | Self-paced (Comfortable) | 70  | 32 (46%)                                           | 35 (50%)              | 3 (4%)                  | -10.9%                                  | -3.3%  | -63.5%                             | 11.1%   |
|                                                        | Slow (0.8-0.9 m/s)       | 23  | 10 (44%)                                           | 12 (52%)              | 1 (4%)                  | -5.1%                                   | -3.4%  | -30.0%                             | 3.6%    |
|                                                        | Very Slow (<0.8 m/s)     | 26  | 7 (27%)                                            | 19 (73%)              | 0                       | -24.1%                                  | -12.2% | -98.0%                             | 2.9%    |
| Steps - Body Placement                                 | Torso                    | 114 | 65 (57%)                                           | 48 (42%)              | 1 (1%)                  | -10.6%                                  | -2.0%  | -98.0%                             | 3.7%    |
|                                                        | Wrist                    | 61  | 15 (25%)                                           | 43 (70%)              | 3 (5%)                  | -8.6%                                   | -6.3%  | -57.4%                             | 11.1%   |
|                                                        | Ankle                    | 16  | 8 (50%)                                            | 7 (44%)               | 1 (6%)                  | -2.9%                                   | -1.1%  | -16.0%                             | 3.6%    |
| Steps - Body Motion                                    | Normal Motion            | 154 | 82 (53%)                                           | 70 (45%)              | 2 (2%)                  | -6.2%                                   | -2.4%  | -98.0%                             | 6.5%    |
|                                                        | Constrained Motion       | 24  | 5 (21%)                                            | 19 (79%)              | 0                       | -20.9%                                  | -11.8% | -81.5%                             | 0.0%    |
|                                                        | Variable Motion          | 10  | 0                                                  | 10 (100%)             | 0                       | -35.0%                                  | -26.2% | -63.5%                             | -8.1%   |
|                                                        | Exaggerated Motion       | 3   | 1 (33%)                                            | 0                     | 2 (67%)                 | 6.2%                                    | 7.5%   | 0.0%                               | 11.1%   |
| Energy Expenditure - Resting                           |                          | 10  | 3 (30%)                                            | 6 (60%)               | 1 (10%)                 | -3.1%                                   | -5.6%  | -15.1%                             | 19.0%   |
| Energy Expenditure - All Activities                    |                          | 88  | 4 (4%)                                             | 41 (47%)              | 43 (49%)                | 4.4%                                    | 2.3%   | -67.6%                             | 85.7%   |
| Energy Expenditure - Body Placement                    | Torso                    | 52  | 2 (4%)                                             | 32 (63%)              | 18 (35%)                | -4.7%                                   | -7.6%  | -67.6%                             | 53.3%   |
|                                                        | Wrist                    | 36  | 3 (8%)                                             | 9 (25%)               | 24 (67%)                | 17.6%                                   | 9.3%   | -52.6%                             | 85.7%   |
| Energy Expenditure -                                   | Jog (> 2.0 m/s)          | 15  | 2 (13%)                                            | 5 (33%)               | 8 (53%)                 | 7.1%                                    | 4.6%   | -22.5%                             | 48.7%   |

|                                         |                           |    |         |          |          |         |        |        |       |
|-----------------------------------------|---------------------------|----|---------|----------|----------|---------|--------|--------|-------|
| Speed of Ambulation                     | Normal (1.0-2.0 m/s)      | 24 | 0       | 7 (29%)  | 17 (71%) | 18.0%   | 11.8%  | -41.4% | 82.3% |
|                                         | Self-paced (Comfortable)  | 39 | 2 (5%)  | 25 (64%) | 12 (31%) | -6.4%   | -8.9%  | -67.6% | 44.0% |
|                                         | Slow (0.8-0.9 m/s)        | 6  | 0       | 2 (33%)  | 4 (68%)  | 15.3%   | 7.0%   | -10.7% | 85.7% |
|                                         | Very Slow (<0.8 m/s)      | 4  | 1 (25%) | 2 (50%)  | 1 (25%)  | 3.1%    | -3.3%  | -44.3% | 63.3% |
| Energy Expenditure - Type of Ambulation | Continuous - No Incline   | 53 | 3 (6%)  | 15 (28%) | 35 (66%) | 16.7%   | 12.8%  | -67.6% | 85.7% |
|                                         | Continuous - Incline      | 11 | 1 (9%)  | 7 (64%)  | 3 (27%)  | -18.7%  | -20.8% | -44.3% | 10.0% |
|                                         | Intermittent - No Incline | 24 | 1 (4%)  | 18 (75%) | 5 (21%)  | -12.0%  | -12.5% | -34.2% | 29.0% |
| Energy Expenditure - Body Motion        | Normal Motion             | 58 | 5 (9%)  | 19 (33%) | 34 (59%) | 12.2%   | 8.6%   | -44.3% | 30.0% |
|                                         | Constrained Motion        | 10 | 0       | 6 (60%)  | 4 (40%)  | -7.9%   | -10.3% | -67.6% | 44.0% |
|                                         | Exaggerated Motion        | 4  | 0       | 3 (75%)  | 1 (25%)  | -4.6%   | -4.1%  | -19.6% | 9.3%  |
|                                         | Variable Motion           | 16 | 0       | 13 (81%) | 3 (19%)  | -13.7%  | -14.6% | -34.2% | 15.9% |
| Sleep - Sensitive Mode                  | Total Sleep               | 1  | 0       | 1 (100%) | 0        | -18.9%  | n/a    | n/a    | n/a   |
|                                         | Sleep Efficiency          | 1  | 0       | 1 (100%) | 0        | -19.0%  | n/a    | n/a    | n/a   |
|                                         | Sleep Onset Latency       | 1  | 0       | 0        | 1 (100%) | 59.9%   | n/a    | n/a    | n/a   |
|                                         | Wake After Sleep Onset    | 1  | 0       | 0        | 1 (100%) | 109.5%  | n/a    | n/a    | n/a   |
| Sleep - Normal Mode                     | Total Sleep               | 3  | 1 (33%) | 0        | 2 (67%)  | 10.1%   | 9.1%   | 3.0%   | 18.0% |
|                                         | Sleep Efficiency          | 3  | 0       | 0        | 3 (100%) | 12.9%   | 11.6%  | 8.8%   | 18.0% |
|                                         | Sleep Onset Latency       | 1  | 0       | 1 (100%) | 0        | -12.0%  | n/a    | n/a    | n/a   |
|                                         | Wake After Sleep Onset    | 1  | 0       | 1 (100%) | 0        | -181.0% | n/a    | n/a    | n/a   |
| Distance - Torso                        | Slow (0.9 m/s)            | 3  | 0       | 0        | 3 (100%) | 33.7%   | 31.2%  | 29.9%  | 40.0% |
|                                         | Normal (1-1.5 m/s)        | 4  | 1 (25%) | 0        | 3 (75%)  | 11.0%   | 9.4%   | -1.8%  | 26.9% |
|                                         | Brisk (1.5-2 m/s)         | 4  | 1 (25%) | 3 (75%)  | 0        | -5.4%   | -6.0%  | -12.1% | 2.5%  |
|                                         | Self-Paced                | 2  | 0       | 0        | 2 (100%) | 4.8%    | n/a    | 4.1%   | 5.4%  |

|                  |                    |   |          |          |          |        |     |     |     |
|------------------|--------------------|---|----------|----------|----------|--------|-----|-----|-----|
| Distance - Wrist | Slow (0.9 m/s)     | 1 | 0        | 0        | 1 (100%) | 26.8%  | n/a | n/a | n/a |
|                  | Normal (1-1.5 m/s) | 1 | 1 (100%) | 0        | 0        | -2.6%  | n/a | n/a | n/a |
|                  | Brisk (1.5-2 m/s)  | 1 | 0        | 1 (100%) | 0        | -19.6% | n/a | n/a | n/a |
|                  | Self -Paced        | 1 | 0        | 0        | 1 (100%) | 12.8%  | n/a | n/a | n/a |
