# Supplementary material for: Accuracy of Fitbit Devices: Systematic Review and Narrative Syntheses of Quantitative Data
Source: PubMed Central journal article supplement (PMC6107736; doi:10.2196/10527), 2018-08-09
Supplement: mhealth_v6i8e10527_app9.pdf [file mhealth_v6i8e10527_app9.pdf]

| Free-Living Settings: Relative Accuracy – Measurement Error (%) |                              |                                |    |                                                  |                        |                          |                                         |        |                                    |        |
|-----------------------------------------------------------------|------------------------------|--------------------------------|----|--------------------------------------------------|------------------------|--------------------------|-----------------------------------------|--------|------------------------------------|--------|
| Outcome                                                         | Reference Criterion          | Sub-Categories                 | #  | Measurement Error (%) - Within / Outside +/- 10% |                        |                          | Measurement Error (%) – Point Estimates |        | Measurement Error (%) - Dispersion |        |
|                                                                 |                              |                                |    | Within ± 10% [# (%)]                             | Less than -10% [# (%)] | Greater than 10% [# (%)] | Mean                                    | Median | Min                                | Max    |
| Sleep (Min / Night)                                             | Sensewear or Actiwatch       | Wrist - Time in Bed            | 4  | 4 (100%)                                         | 0                      | 0                        | 4.0%                                    | n/a    | -0.4%                              | 9.0%   |
|                                                                 | Actiwatch                    | Wrist - Total Sleep            | 1  | 1 (100%)                                         | 0                      | 0                        | 5.8%                                    | n/a    | n/a                                | n/a    |
| Time in Activity (Min / Day)                                    | Actical (ankle) or ActiGraph | Sedentary                      | 4  | 1 (25%)                                          | 3 (75%)                | 0                        | -11.1%                                  | -12.5% | -15.3%                             | -4.0%  |
|                                                                 |                              | Light                          | 5  | 1 (20%)                                          | 0                      | 4 (80%)                  | 43.5%                                   | 53.2%  | 4.6%                               | 59.0%  |
|                                                                 |                              | Moderate                       | 6  | 0                                                | 1 (17%)                | 5 (83%)                  | 40.6%                                   | 44.8%  | -72.6%                             | 122.6% |
|                                                                 |                              | Vigorous                       | 6  | 0                                                | 0                      | 6 (100%)                 | 632%                                    | 389.5% | 346%                               | 1900%  |
|                                                                 | ActiGraph                    | MVPA                           | 7  | 1 (29%)                                          | 0                      | 6 (71%)                  | 84.9%                                   | 96.1%  | 2.6%                               | 150.0% |
| Steps (Steps / Day)                                             | All Accuracy Comparisons     |                                | 20 | 11 (55%)                                         | 3 (15%)                | 6 (30%)                  | 7.5%                                    | 8.3%   | -43.1%                             | 30.2%  |
|                                                                 | ActiGraph                    | Torso (Old)                    | 1  | 1 (100%)                                         | 0                      | 0                        | 9%                                      | n/a    | n/a                                | n/a    |
|                                                                 |                              | Torso (Young)                  | 7  | 5 (71%)                                          | 0                      | 2 (29%)                  | 8.4%                                    | 8.86%  | 4.4%                               | 11.1%  |
|                                                                 |                              | Wrist (Old)                    | 2  | 0                                                | 1 (50%)                | 1 (50%)                  | -11%                                    | n/a    | -36%                               | 13.0%  |
|                                                                 |                              | Wrist (Young)                  | 4  | 2 (50%)                                          | 0                      | 2 (50%)                  | 15.3%                                   | 12.3%  | 6.4%                               | 30.2%  |
|                                                                 | ActivPAL                     | Wrist / Torso (Young)          | 2  | 2 (100%)                                         | 0                      | 0                        | 4.3%                                    | n/a    | 1.2%                               | 7.4%   |
|                                                                 | Omron                        | Torso (Old)                    | 1  | 0                                                | 0                      | 1 (100%)                 | 36.3%                                   | n/a    | n/a                                | n/a    |
|                                                                 | Shimmer or Actical (ankle)   | Torso (Old - Limited Mobility) | 3  | 1 (33%)                                          | 2 (66%)                | 0                        | -24.3%                                  | -25.3% | -43.1%                             | -4.7%  |

|                                                                                                                                                                   |                       |               |   |          |          |   |        |        |        |        |
|-------------------------------------------------------------------------------------------------------------------------------------------------------------------|-----------------------|---------------|---|----------|----------|---|--------|--------|--------|--------|
| Energy Expenditure [Kcal / Day(s)]                                                                                                                                | Sensewear             | Wrist / Torso | 4 | 0        | 4 (100%) | 0 | -15.3% | -15.4% | -16.5% | -13.7% |
|                                                                                                                                                                   | Doubly Labelled Water | Wrist         | 1 | 1 (100%) | 0        | 0 | -7.4%  | n/a    | n/a    | n/a    |
| <p>MVPA = Moderate to Vigorous Physical Activity<br/> Accelerometers = ActiGraph, Actical ActivPAL, Actiwatch or Sensewear<br/> Pedometers = Omron or Shimmer</p> |                       |               |   |          |          |   |        |        |        |        |
